# Supplementary material for: Reactivity of superheavy elements Cn and Fl and of their oxides in comparison with homologous species of Hg and Pb, respectively, towards gold and hydroxylated quartz surfaces
Source: Royal Society of Chemistry journal article supplement (doi:10.1039/d2dt00240j), 2022-01-01
Supplement: d2dt00240j1.pdf [file d2dt00240j1.pdf]

## Supporting Information

Reactivity of Superheavy Elements Cn and Fl and of their Oxides in Comparison with  
Homologous Species of Hg and Pb, respectively, towards Gold and Hydroxylated Quartz  
Surfaces

*Valeria Pershina*

GSI Helmholtzzentrum für Schwerionenforschung GmbH, Planckstr. 1, 64291 Darmstadt,  
Germany

*Miroslav Iliáš*<sup>a,b</sup>

<sup>a</sup>Helmholtz Institute Mainz, Johannes Gutenberg-Universität, 55099 Mainz, Mainz,  
Germany

<sup>b</sup>Department of Chemistry, Faculty of Natural Sciences, Matej Bel University,  
Tajovského 40, 97401 Banská Bystrica, Slovakia

## Coordinates of atoms (converged geometry)

### (4x4)HgO/Au(111)

66 atoms

|    |           |           |           |
|----|-----------|-----------|-----------|
| Au | -0.021887 | 0.087036  | 0.207865  |
| Au | 1.440258  | 0.886070  | -2.252124 |
| Au | -1.443215 | -0.807447 | -4.593772 |
| Au | 0.002608  | 0.002129  | -7.057811 |
| Au | 1.435577  | 2.583173  | 0.220665  |
| Au | 2.887471  | 3.376241  | -2.219358 |
| Au | -0.005951 | 1.689276  | -4.594001 |
| Au | 1.443744  | 2.498564  | -7.056026 |
| Au | -2.884863 | -4.917466 | 0.255902  |
| Au | -1.442368 | -4.114178 | -2.223601 |
| Au | 1.442257  | 4.184464  | -4.582085 |
| Au | -2.879664 | -4.990739 | -7.061380 |
| Au | -1.454153 | -2.427190 | 0.215529  |
| Au | -0.003360 | -1.617129 | -2.246950 |
| Au | -2.880647 | -3.303187 | -4.582255 |
| Au | -1.438528 | -2.494305 | -7.059596 |
| Au | 2.909944  | 0.091477  | 0.190406  |
| Au | 4.318539  | 0.877233  | -2.214879 |
| Au | 1.448018  | -0.804150 | -4.602262 |
| Au | 2.885152  | 0.002286  | -7.056404 |
| Au | 4.327750  | 2.576881  | 0.250835  |
| Au | 5.768463  | 3.375190  | -2.226040 |
| Au | 2.887856  | 1.692588  | -4.592539 |
| Au | 4.326288  | 2.498720  | -7.054620 |
| Au | -0.005960 | -4.925632 | 0.242256  |
| Au | 1.439336  | -4.101954 | -2.206648 |
| Au | 4.321409  | 4.187350  | -4.583519 |
| Au | 0.002880  | -4.990583 | -7.059974 |
| Au | 1.439538  | -2.444548 | 0.219197  |
| Au | 2.886290  | -1.617927 | -2.249620 |
| Au | 0.000720  | -3.306193 | -4.591666 |

|      |           |           |           |
|------|-----------|-----------|-----------|
| Au   | 1.444016  | -2.494149 | -7.058189 |
| Au   | -5.759191 | 0.077043  | 0.249866  |
| Au   | -4.324668 | 0.885880  | -2.225731 |
| Au   | 4.330756  | -0.806190 | -4.594176 |
| Au   | -5.762480 | 0.001817  | -7.060623 |
| Au   | -4.324182 | 2.571099  | 0.264178  |
| Au   | -2.887107 | 3.375710  | -2.221959 |
| Au   | 5.766907  | 1.689315  | -4.584532 |
| Au   | -4.321344 | 2.498251  | -7.058839 |
| Au   | -8.648687 | -4.923467 | 0.247648  |
| Au   | -7.207194 | -4.115714 | -2.223944 |
| Au   | 7.208474  | 4.189520  | -4.583675 |
| Au   | -8.644751 | -4.991052 | -7.064193 |
| Au   | -7.198830 | -2.431620 | 0.218982  |
| Au   | -5.761850 | -1.611414 | -2.219514 |
| Au   | 2.880317  | -3.308414 | -4.593096 |
| Au   | -7.203615 | -2.494618 | -7.062408 |
| Au   | -2.894607 | 0.074978  | 0.244038  |
| Au   | -1.435868 | 0.875202  | -2.207713 |
| Au   | -4.322271 | -0.809518 | -4.583368 |
| Au   | -2.879936 | 0.001973  | -7.059217 |
| Au   | -1.448764 | 2.576005  | 0.249097  |
| Au   | -0.004167 | 3.377372  | -2.225043 |
| Au   | -2.878436 | 1.687917  | -4.581652 |
| Au   | -1.438800 | 2.498407  | -7.057432 |
| Au   | -5.767116 | -4.918369 | 0.265037  |
| Au   | -4.328093 | -4.113975 | -2.211844 |
| Au   | -1.438524 | 4.187208  | -4.583803 |
| Au   | -5.762208 | -4.990896 | -7.062787 |
| Au   | -4.325745 | -2.421018 | 0.260313  |
| Au   | -2.885131 | -1.614036 | -2.223650 |
| Au   | -5.766277 | -3.302174 | -4.582867 |
| Au   | -4.321072 | -2.494461 | -7.061002 |
| Hg   | 1.463337  | -0.721663 | 2.500024  |
| O    | 1.503819  | -0.691206 | 4.452456  |
| VEC1 | 11.530177 | 0.000000  | 0.000000  |

VEC2 5.765088 9.985426 0.000000

**(4x4)CnO/Au(111)**

66 atoms

|    |           |           |           |
|----|-----------|-----------|-----------|
| Au | -0.020732 | 0.062268  | 0.214846  |
| Au | 1.441629  | 0.876060  | -2.248230 |
| Au | -1.441880 | -0.809868 | -4.593281 |
| Au | 0.002608  | 0.002129  | -7.057811 |
| Au | 1.436586  | 2.569950  | 0.210250  |
| Au | 2.888605  | 3.368213  | -2.223137 |
| Au | -0.004581 | 1.685227  | -4.590099 |
| Au | 1.443744  | 2.498564  | -7.056026 |
| Au | -2.884289 | -4.938769 | 0.251988  |
| Au | -1.442603 | -4.125749 | -2.231895 |
| Au | 1.443774  | 4.181626  | -4.584244 |
| Au | -2.879664 | -4.990739 | -7.061380 |
| Au | -1.462033 | -2.450223 | 0.198988  |
| Au | -0.004103 | -1.625608 | -2.247167 |
| Au | -2.881420 | -3.305271 | -4.585317 |
| Au | -1.438528 | -2.494305 | -7.059596 |
| Au | 2.900629  | 0.066158  | 0.205645  |
| Au | 4.314678  | 0.865700  | -2.207226 |
| Au | 1.449296  | -0.805480 | -4.600356 |
| Au | 2.885152  | 0.002286  | -7.056404 |
| Au | 4.325537  | 2.551969  | 0.246441  |
| Au | 5.768418  | 3.362274  | -2.230725 |
| Au | 2.888338  | 1.690062  | -4.589221 |
| Au | 4.326288  | 2.498720  | -7.054620 |
| Au | -0.009404 | -4.951272 | 0.235310  |
| Au | 1.440933  | -4.112821 | -2.206033 |
| Au | 4.322963  | 4.185380  | -4.586351 |
| Au | 0.002880  | -4.990583 | -7.059974 |
| Au | 1.435474  | -2.467219 | 0.201953  |
| Au | 2.887114  | -1.626460 | -2.250360 |
| Au | -0.000059 | -3.306567 | -4.592768 |
| Au | 1.444016  | -2.494149 | -7.058189 |

|      |           |           |           |
|------|-----------|-----------|-----------|
| Au   | -5.763463 | 0.058002  | 0.247411  |
| Au   | -4.326313 | 0.876440  | -2.229555 |
| Au   | 4.330406  | -0.808482 | -4.593204 |
| Au   | -5.762480 | 0.001817  | -7.060623 |
| Au   | -4.321562 | 2.551687  | 0.258930  |
| Au   | -2.884254 | 3.366221  | -2.224489 |
| Au   | 5.766569  | 1.686109  | -4.584012 |
| Au   | -4.321344 | 2.498251  | -7.058839 |
| Au   | -8.644241 | -4.946503 | 0.245344  |
| Au   | -7.205797 | -4.125590 | -2.230345 |
| Au   | 7.209516  | 4.189471  | -4.583812 |
| Au   | -8.644751 | -4.991052 | -7.064193 |
| Au   | -7.193663 | -2.452038 | 0.207513  |
| Au   | -5.761746 | -1.620045 | -2.224693 |
| Au   | 2.880805  | -3.309994 | -4.594006 |
| Au   | -7.203615 | -2.494618 | -7.062408 |
| Au   | -2.895445 | 0.055752  | 0.238909  |
| Au   | -1.434322 | 0.866718  | -2.200592 |
| Au   | -4.322303 | -0.811053 | -4.587376 |
| Au   | -2.879936 | 0.001973  | -7.059217 |
| Au   | -1.444002 | 2.555170  | 0.249624  |
| Au   | -0.003171 | 3.370486  | -2.229064 |
| Au   | -2.875393 | 1.685501  | -4.580502 |
| Au   | -1.438800 | 2.498407  | -7.057432 |
| Au   | -5.764195 | -4.936869 | 0.260632  |
| Au   | -4.326966 | -4.122631 | -2.214367 |
| Au   | -1.436994 | 4.185311  | -4.586936 |
| Au   | -5.762208 | -4.990896 | -7.062787 |
| Au   | -4.326662 | -2.439406 | 0.256417  |
| Au   | -2.887721 | -1.622208 | -2.231327 |
| Au   | -5.765986 | -3.304011 | -4.585427 |
| Au   | -4.321072 | -2.494461 | -7.061002 |
| Cn   | 1.389307  | -0.848539 | 2.619222  |
| O    | 1.452629  | -0.805390 | 4.582249  |
| VEC1 | 11.530177 | 0.000000  | 0.000000  |
| VEC2 | 5.765088  | 9.985426  | 0.000000  |

(4x)PbO/Au(111)

66 atoms

|    |                   |                   |                   |
|----|-------------------|-------------------|-------------------|
| Au | -0.04040263119409 | 0.02715052259217  | 0.07561670305514  |
| Au | 1.43821383823081  | 0.84689561654586  | -2.33319167344574 |
| Au | -1.44127064208228 | -0.82692411088840 | -4.71079472336724 |
| Au | 0.00640328362484  | -0.00478863670543 | -7.19031373486933 |
| Au | 1.43760293787144  | 2.55607651162998  | 0.10728893670465  |
| Au | 2.88635310880850  | 3.34079990289714  | -2.33332887385549 |
| Au | 0.01796351217818  | 1.66077762183955  | -4.69746390171212 |
| Au | 1.45049528366271  | 2.48797436713964  | -7.16097952190622 |
| Au | -2.87293570038682 | -4.94837740893211 | 0.13403691930292  |
| Au | -1.43786638807691 | -4.13875081052312 | -2.33646852537391 |
| Au | 1.44929445905341  | 4.16462868151756  | -4.68018200552574 |
| Au | -2.87406825541942 | -4.99817631581491 | -7.15298707739089 |
| Au | -1.43884198593830 | -2.46596087506678 | 0.11006460695141  |
| Au | 0.00129107752953  | -1.64998620875017 | -2.38699502393021 |
| Au | -2.87446308309224 | -3.32360856770620 | -4.69537068086206 |
| Au | -1.43398458339889 | -2.50131127628297 | -7.17575299641572 |
| Au | 2.90327577102954  | 0.04318192085134  | 0.09465144956125  |
| Au | 4.30945633556566  | 0.83797053035521  | -2.30776180620552 |
| Au | 1.44670370416491  | -0.82405274217715 | -4.72679078315787 |
| Au | 2.88971520158129  | -0.00542960295285 | -7.18551539989784 |
| Au | 4.34221895801218  | 2.54928918117456  | 0.12193311908889  |
| Au | 5.77028853382167  | 3.34010444231070  | -2.33129620318277 |
| Au | 2.89176249287288  | 1.67187848423796  | -4.69703329567691 |
| Au | 4.33533638301354  | 2.48909464191034  | -7.16128193332270 |
| Au | 0.00740522829332  | -4.97974011955803 | 0.14476969315081  |
| Au | 1.44523658106130  | -4.15908711403500 | -2.37381038692591 |
| Au | 4.33255909671415  | 4.16690808010754  | -4.68446925413272 |
| Au | 0.00167128181833  | -5.00304326454343 | -7.15439907595917 |
| Au | 1.44471934298226  | -2.53064928485864 | 0.00022377116616  |
| Au | 2.88870467756727  | -1.64180142799215 | -2.35299310808816 |
| Au | 0.00235308686396  | -3.33180078511002 | -4.71928791847400 |
| Au | 1.44899968752270  | -2.50363682693124 | -7.18933731615493 |
| Au | -5.73288382106560 | 0.02627929818940  | 0.12822438450430  |
| Au | -4.31977897577912 | 0.85229831149562  | -2.32525809481062 |
| Au | 4.33437832879785  | -0.82362473808968 | -4.70798423352748 |
| Au | -5.75677800022909 | -0.00338729022881 | -7.16480550584956 |

|      |                   |                   |                   |
|------|-------------------|-------------------|-------------------|
| Au   | -4.31476640071987 | 2.52612446635714  | 0.15900184355782  |
| Au   | -2.88059237008876 | 3.34411440192421  | -2.32392403555065 |
| Au   | 5.75749865581805  | 1.66068111354873  | -4.67249927029521 |
| Au   | -4.31701351856898 | 2.48445560500998  | -7.13582380593644 |
| Au   | -8.63250895085246 | -4.97813882070726 | 0.14103650131251  |
| Au   | -7.20309961492033 | -4.14602276386929 | -2.33703755538870 |
| Au   | 7.21522316788135  | 4.15324133597886  | -4.69626914610810 |
| Au   | -8.63683006167040 | -5.00038572297901 | -7.13532899609477 |
| Au   | -7.18231353064483 | -2.48964851069464 | 0.10513064832991  |
| Au   | -5.76583423595104 | -1.64169218804560 | -2.32900874867720 |
| Au   | 2.88614766298102  | -3.30721491380115 | -4.71043539899952 |
| Au   | -7.19896131597915 | -2.50024745778104 | -7.17014595264609 |
| Au   | -2.88344925764645 | 0.03902101815242  | 0.16111010705174  |
| Au   | -1.44250255008972 | 0.85524311034178  | -2.34686065425228 |
| Au   | -4.31595950037890 | -0.82772908569233 | -4.68422371846789 |
| Au   | -2.87875921521535 | -0.01147982177434 | -7.15887880375905 |
| Au   | -1.43744976830849 | 2.52776783364069  | 0.14432346855341  |
| Au   | -0.00092024559928 | 3.35003234939211  | -2.33006212276865 |
| Au   | -2.87914087147142 | 1.66442396891700  | -4.68879628596606 |
| Au   | -1.43339923387085 | 2.49333276303433  | -7.13076222656311 |
| Au   | -5.75589847370668 | -4.96223675701011 | 0.16621362626072  |
| Au   | -4.31873414881058 | -4.14034295262420 | -2.32559741686474 |
| Au   | -1.43870318504620 | 4.16375998909529  | -4.67999804350211 |
| Au   | -5.75474189660506 | -4.99802390416717 | -7.13356354634891 |
| Au   | -4.30783463086648 | -2.46762935070776 | 0.13645820205198  |
| Au   | -2.88160756196228 | -1.64319392834775 | -2.33235160904478 |
| Au   | -5.76106695492489 | -3.31853186945312 | -4.68049436686467 |
| Au   | -4.31651024476018 | -2.50371746442800 | -7.14836797732182 |
| Pb   | 1.09464408247062  | -1.31345903471731 | 2.61448449790964  |
| O    | 2.70475133352821  | -0.00075301623995 | 2.22938401692834  |
| VEC1 | 11.53017660000000 | 0.00000000000000  | 0.00000000000000  |
| VEC2 | 5.76508831000000  | 9.98542585000000  | 0.00000000000000  |

**(4x4)FIO/A(111)**

66 atoms

|    |           |          |           |
|----|-----------|----------|-----------|
| Au | -0.057092 | 0.128050 | 0.110694  |
| Au | 1.447517  | 0.885879 | -2.224519 |

|    |           |           |           |
|----|-----------|-----------|-----------|
| Au | -1.456405 | -0.802038 | -4.611503 |
| Au | 0.002608  | 0.002129  | -7.057811 |
| Au | 1.430409  | 2.627948  | 0.209858  |
| Au | 2.882266  | 3.377281  | -2.228162 |
| Au | 0.014712  | 1.685865  | -4.595056 |
| Au | 1.443744  | 2.498564  | -7.056026 |
| Au | -2.879984 | -4.878057 | 0.230531  |
| Au | -1.447912 | -4.104760 | -2.225614 |
| Au | 1.440953  | 4.191629  | -4.585686 |
| Au | -2.879664 | -4.990739 | -7.061380 |
| Au | -1.438667 | -2.391180 | 0.237277  |
| Au | -0.014387 | -1.602982 | -2.288750 |
| Au | -2.886900 | -3.296893 | -4.593794 |
| Au | -1.438528 | -2.494305 | -7.059596 |
| Au | 2.892265  | 0.111611  | 0.252960  |
| Au | 4.296289  | 0.876577  | -2.183414 |
| Au | 1.447043  | -0.796396 | -4.605015 |
| Au | 2.885152  | 0.002286  | -7.056404 |
| Au | 4.332599  | 2.623149  | 0.232291  |
| Au | 5.761778  | 3.386298  | -2.229189 |
| Au | 2.888346  | 1.703184  | -4.590522 |
| Au | 4.326288  | 2.498720  | -7.054620 |
| Au | 0.003318  | -4.903952 | 0.265976  |
| Au | 1.439631  | -4.117826 | -2.262895 |
| Au | 4.324897  | 4.196005  | -4.584490 |
| Au | 0.002880  | -4.990583 | -7.059974 |
| Au | 1.421508  | -2.452786 | 0.122500  |
| Au | 2.877473  | -1.612256 | -2.233238 |
| Au | -0.008712 | -3.301768 | -4.606119 |
| Au | 1.444016  | -2.494149 | -7.058189 |
| Au | -5.736899 | 0.102238  | 0.228161  |
| Au | -4.331834 | 0.895966  | -2.232828 |
| Au | 4.331971  | -0.799048 | -4.590712 |
| Au | -5.762480 | 0.001817  | -7.060623 |
| Au | -4.324191 | 2.598833  | 0.252776  |
| Au | -2.888398 | 3.385667  | -2.237645 |
| Au | 5.752686  | 1.685138  | -4.567973 |
| Au | -4.321344 | 2.498251  | -7.058839 |



|      |           |           |           |
|------|-----------|-----------|-----------|
| Au   | -8.643378 | -4.904367 | 0.230598  |
| Au   | -7.207347 | -4.109360 | -2.237141 |
| Au   | 7.201799  | 4.189114  | -4.602683 |
| Au   | -8.644751 | -4.991052 | -7.064193 |
| Au   | -7.184838 | -2.414333 | 0.209714  |
| Au   | -5.771668 | -1.599916 | -2.232249 |
| Au   | 2.883903  | -3.286012 | -4.604023 |
| Au   | -7.203615 | -2.494618 | -7.062408 |
| Au   | -2.890518 | 0.111126  | 0.260201  |
| Au   | -1.461033 | 0.902222  | -2.270077 |
| Au   | -4.322255 | -0.802430 | -4.588170 |
| Au   | -2.879936 | 0.001973  | -7.059217 |
| Au   | -1.446470 | 2.609750  | 0.240913  |
| Au   | -0.005951 | 3.385261  | -2.240732 |
| Au   | -2.890551 | 1.696724  | -4.606920 |
| Au   | -1.438800 | 2.498407  | -7.057432 |
| Au   | -5.763167 | -4.888092 | 0.272076  |
| Au   | -4.327619 | -4.105939 | -2.222490 |
| Au   | -1.448597 | 4.186169  | -4.598950 |
| Au   | -5.762208 | -4.990896 | -7.062787 |
| Au   | -4.309200 | -2.394888 | 0.239348  |
| Au   | -2.886977 | -1.608691 | -2.229947 |
| Au   | -5.766231 | -3.300363 | -4.585028 |
| Au   | -4.321072 | -2.494461 | -7.061002 |
| Fl   | 0.735462  | -1.056748 | 2.806577  |
| O    | 2.764452  | -0.121671 | 2.343860  |
| VEC1 | 11.530177 | 0.000000  | 0.000000  |
| VEC2 | 5.765088  | 9.985426  | 0.000000  |

**(4x4)HgO/SiO2-2OH**

322 atoms

|    |              |             |             |
|----|--------------|-------------|-------------|
| Si | 10.13011045  | 4.06102004  | -7.19575773 |
| Si | 12.60503670  | 8.30152355  | -7.18500472 |
| Si | -14.27950806 | -8.38365521 | -8.97589976 |
| Si | -11.83667296 | -4.17357344 | -8.96631273 |
| Si | -9.42488782  | 0.08012452  | -8.96746207 |
| Si | -6.96164243  | 4.31748857  | -8.97135107 |
| Si | -9.38057605  | -8.40392359 | -8.98644381 |

|    |              |             |             |
|----|--------------|-------------|-------------|
| Si | -6.94321024  | -4.15216800 | -8.98391117 |
| Si | -4.51151426  | 0.08820457  | -8.99103413 |
| Si | -2.08472048  | 4.37961474  | -9.03501429 |
| Si | -4.48936095  | -8.39462887 | -8.98640611 |
| Si | -2.03595162  | -4.14019312 | -8.96290700 |
| Si | 0.40014021   | 0.14599857  | -8.92171781 |
| Si | 2.87220547   | 4.24115018  | -9.02628228 |
| Si | 0.37854314   | -8.41932963 | -8.97275741 |
| Si | 2.89618118   | -4.21605581 | -8.98818768 |
| Si | 5.28502344   | 0.21649567  | -9.01102321 |
| Si | 7.67634789   | 4.26259641  | -8.98202895 |
| O  | -11.92549963 | -5.13892364 | -4.81053863 |
| O  | -9.49532344  | -0.88714048 | -4.82379714 |
| O  | -7.04260081  | 3.34368053  | -4.84223238 |
| O  | -4.61074027  | 7.58105985  | -4.84141592 |
| O  | -7.04253324  | -5.12816802 | -4.82976530 |
| O  | -4.59078420  | -0.87674521 | -4.81901583 |
| O  | -2.11926743  | 3.39706019  | -4.81388697 |
| O  | 0.29462172   | 7.57353963  | -4.83676426 |
| O  | -2.13329889  | -5.12934270 | -4.84089317 |
| O  | 0.32594112   | -0.89101632 | -4.85196329 |
| O  | 2.69829974   | 3.29132588  | -4.83381900 |
| O  | 5.18373060   | 7.58823634  | -4.81051860 |
| O  | 2.73494926   | -5.15154051 | -4.83243497 |
| O  | 5.16511180   | -0.93422124 | -4.82516756 |
| O  | 7.61817835   | 3.33755736  | -4.81822071 |
| O  | 10.05889025  | 7.57096220  | -4.83406278 |
| O  | -10.07651841 | -5.78312955 | -1.25271772 |
| O  | -7.64418690  | -1.53862921 | -1.24985006 |
| O  | -5.20971570  | 2.70675901  | -1.25801514 |
| O  | -2.74784252  | 6.92929310  | -1.24958348 |
| O  | -5.20063908  | -5.77647025 | -1.27489951 |
| O  | -2.75135943  | -1.54788511 | -1.27014098 |
| O  | -0.31731084  | 2.70484679  | -1.25452241 |
| O  | 2.15425305   | 6.93383472  | -1.25133299 |
| O  | -0.32813572  | -5.79913344 | -1.25089900 |
| O  | 2.13707605   | -1.55321888 | -1.25326431 |
| O  | 4.57315072   | 2.68721509  | -1.26514087 |

O 7.02188158 6.92782093 -1.26666049  
O 4.59481132 -5.81012019 -1.23471051  
O 7.02213262 -1.55497379 -1.25920939  
O 9.46885596 2.67720267 -1.25658164  
O 11.91976927 6.90467016 -1.26384204  
O -12.84289809 -8.05453857 -3.05991881  
O -10.39374292 -3.79394871 -3.04166568  
O -7.95643115 0.44047974 -3.04949652  
O -5.52061393 4.68789999 -3.06311498  
O -7.93516272 -8.05894720 -3.07037867  
O -5.49724755 -3.78523652 -3.07199297  
O -3.05491550 0.45324383 -3.04717660  
O -0.61787117 4.72379259 -3.01363134  
O -3.04585807 -8.02544522 -3.05586155  
O -0.59961582 -3.81344795 -3.05726297  
O 1.84154535 0.42731247 -3.06206580  
O 4.27063945 4.64059043 -3.09625318  
O 1.84338478 -8.06975079 -3.06940819  
O 4.27892179 -3.84512955 -3.04914039  
O 6.71868087 0.41741876 -3.07647292  
O 9.17061705 4.66554812 -3.05303572  
O -11.90279555 -7.52215272 -0.59607579  
O -9.45754274 -3.28133675 -0.57265224  
O -7.02537670 0.96571691 -0.57874349  
O -4.59694523 5.21441403 -0.59434623  
O -7.03246601 -7.50366801 -0.59799926  
O -4.57451062 -3.27747156 -0.59890464  
O -2.10493704 0.94232801 -0.57920634  
O 0.35175009 5.18859527 -0.54953339  
O -2.13735203 -7.53489364 -0.57466727  
O 0.32500851 -3.30000706 -0.58790054  
O 2.75419423 0.95226222 -0.58833729  
O 5.16889536 5.20763714 -0.62542353  
O 2.75972633 -7.54653076 -0.59725104  
O 5.20292155 -3.29430559 -0.58728438  
O 7.62637748 0.95647432 -0.60529912  
O 10.10300684 5.17243746 -0.58174821  
O -10.06998888 -6.89878281 -4.13508911

|    |              |             |             |
|----|--------------|-------------|-------------|
| O  | -7.63919802  | -2.64431773 | -4.14946277 |
| O  | -5.19551844  | 1.59959307  | -4.13199213 |
| O  | -2.76134594  | 5.85363345  | -4.11376416 |
| O  | -5.19369668  | -6.88653091 | -4.13607297 |
| O  | -2.72286213  | -2.64797317 | -4.16270143 |
| O  | -0.29745070  | 1.58624360  | -4.13917229 |
| O  | 2.11782186   | 5.78332899  | -4.17000646 |
| O  | -0.29410832  | -6.90374082 | -4.13967233 |
| O  | 2.10213762   | -2.69988466 | -4.08179161 |
| O  | 4.55793783   | 1.54397776  | -4.16378244 |
| O  | 7.03645549   | 5.82652039  | -4.11819994 |
| O  | 4.56568017   | -6.91421213 | -4.10984140 |
| O  | 7.02173204   | -2.66967448 | -4.10905165 |
| O  | 9.46505994   | 1.58423053  | -4.11713743 |
| O  | 11.89091886  | 5.80308785  | -4.15182000 |
| O  | -7.93690196  | -4.63271667 | -2.35626584 |
| O  | -5.50025763  | -0.39353981 | -2.34899953 |
| O  | -3.06519312  | 3.84226616  | -2.35186351 |
| O  | -0.60075704  | 8.05897948  | -2.36098975 |
| O  | -3.05212894  | -4.64049977 | -2.37331614 |
| O  | -0.60632903  | -0.42056831 | -2.37953426 |
| O  | 1.83085536   | 3.82466315  | -2.35755265 |
| O  | 4.30043939   | 8.08394102  | -2.33735200 |
| O  | 1.83663148   | -4.71062945 | -2.33989644 |
| O  | 4.28506925   | -0.42297237 | -2.34920659 |
| O  | 6.72373889   | 3.82352408  | -2.34819032 |
| O  | 9.18034581   | 8.06477510  | -2.34912965 |
| O  | 6.73903486   | -4.67360191 | -2.33749568 |
| O  | 9.17151020   | -0.42098302 | -2.34900165 |
| O  | 11.61851660  | 3.80890627  | -2.36384804 |
| O  | 14.07486860  | 8.02886990  | -2.35250105 |
| Si | -11.27371070 | -6.06033458 | -0.07858801 |
| Si | -8.83733456  | -1.80928572 | -0.07060505 |
| Si | -6.40216496  | 2.43685008  | -0.07841876 |
| Si | -3.96122818  | 6.67722204  | -0.08663149 |
| Si | -6.39442921  | -6.04068755 | -0.09321711 |
| Si | -3.94072783  | -1.81566898 | -0.08650233 |
| Si | -1.49562069  | 2.41564975  | -0.06762388 |

|    |              |             |             |
|----|--------------|-------------|-------------|
| Si | 0.98539773   | 6.65548515  | -0.05064788 |
| Si | -1.51599911  | -6.06647379 | -0.06757989 |
| Si | 0.94199639   | -1.82876180 | -0.07951890 |
| Si | 3.38395359   | 2.41933674  | -0.08302650 |
| Si | 5.80708364   | 6.66469960  | -0.10561283 |
| Si | 3.38703543   | -6.08605564 | -0.07229574 |
| Si | 5.82431388   | -1.82251945 | -0.08490174 |
| Si | 8.25617339   | 2.42034482  | -0.09354924 |
| Si | 10.73573070  | 6.63622139  | -0.07508740 |
| Si | -9.46505030  | -4.36467656 | -1.81032580 |
| Si | -7.03134471  | -0.12226258 | -1.81255200 |
| Si | -4.59726169  | 4.12197293  | -1.82425956 |
| Si | -2.12916285  | 8.33857842  | -1.82379953 |
| Si | -4.58045839  | -4.36257481 | -1.83443403 |
| Si | -2.12676863  | -0.13265623 | -1.82309161 |
| Si | 0.31333790   | 4.12038913  | -1.79994120 |
| Si | 2.76255305   | 8.34960665  | -1.81893480 |
| Si | 0.30846110   | -4.39529251 | -1.81355687 |
| Si | 2.75529475   | -0.13986861 | -1.81739267 |
| Si | 5.18386586   | 4.09913533  | -1.84036005 |
| Si | 7.64870375   | 8.34186187  | -1.81738801 |
| Si | 5.20632647   | -4.39751610 | -1.80630920 |
| Si | 7.63544562   | -0.14202632 | -1.82944909 |
| Si | 10.09153558  | 4.08849112  | -1.81947599 |
| Si | 12.54222086  | 8.31596426  | -1.82563660 |
| Si | -14.36816008 | -8.32317261 | -3.58609401 |
| Si | -11.91725596 | -4.07177312 | -3.56939928 |
| Si | -9.48195121  | 0.17738349  | -3.57962167 |
| Si | -7.04179213  | 4.40804783  | -3.59936429 |
| Si | -9.46310085  | -8.31504744 | -3.59691804 |
| Si | -7.02437004  | -4.04987239 | -3.59705194 |
| Si | -4.57879783  | 0.19508095  | -3.57970353 |
| Si | -2.13347420  | 4.45249131  | -3.56501207 |
| Si | -4.57291007  | -8.28973290 | -3.58135567 |
| Si | -2.12277492  | -4.05940083 | -3.60067771 |
| Si | 0.31987290   | 0.17477297  | -3.60455320 |
| Si | 2.73904867   | 4.38288147  | -3.61465435 |
| Si | 0.31299592   | -8.31813307 | -3.59231218 |

|    |              |             |              |
|----|--------------|-------------|--------------|
| Si | 2.75126076   | -4.10608024 | -3.56986295  |
| Si | 5.19094423   | 0.15248039  | -3.60050437  |
| Si | 7.64425081   | 4.41027983  | -3.58301816  |
| O  | -11.95611854 | -5.43323234 | -10.04241266 |
| O  | -9.50853339  | -1.21239419 | -10.01584645 |
| O  | -7.09007823  | 3.03830723  | -10.03035719 |
| O  | -4.61642570  | 7.32945278  | -10.07135512 |
| O  | -7.05845167  | -5.43567048 | -10.03260492 |
| O  | -4.50139015  | -1.24963017 | -9.99653468  |
| O  | -2.42776776  | 3.36272426  | -10.26934361 |
| O  | 0.24258977   | 7.28083931  | -10.03397970 |
| O  | -2.23112689  | -5.35709514 | -10.06707554 |
| O  | -0.12015087  | -1.13619441 | -9.95563307  |
| O  | 2.78793102   | 2.90211759  | -9.96517789  |
| O  | 5.14862978   | 7.30514396  | -10.06095073 |
| O  | 2.70019217   | -5.46317802 | -10.06216941 |
| O  | 5.08156579   | -1.13914120 | -10.05490998 |
| O  | 7.45977687   | 2.97584704  | -9.99451471  |
| O  | 10.02167298  | 7.27132092  | -10.03849933 |
| O  | -9.93025077  | -5.79628164 | -6.53918711  |
| O  | -7.51307272  | -1.55619673 | -6.56261612  |
| O  | -5.03323088  | 2.66560249  | -6.55373257  |
| O  | -2.58911093  | 6.92220249  | -6.53392300  |
| O  | -5.02703348  | -5.77809321 | -6.53087808  |
| O  | -2.60290957  | -1.50243613 | -6.55170436  |
| O  | -0.13932033  | 2.68937677  | -6.54185853  |
| O  | 2.30783161   | 6.91968273  | -6.54323138  |
| O  | -0.12903361  | -5.80279335 | -6.54276501  |
| O  | 2.40230792   | -1.62147001 | -6.46317088  |
| O  | 4.72578271   | 2.67933339  | -6.54466912  |
| O  | 7.16789921   | 6.91409869  | -6.52769037  |
| O  | 4.75235924   | -5.84465130 | -6.52318337  |
| O  | 7.19599181   | -1.58841678 | -6.51748421  |
| O  | 9.62263631   | 2.66168077  | -6.52557074  |
| O  | 12.06248658  | 6.89992089  | -6.55155652  |
| O  | -12.71680893 | -8.23155861 | -8.49912212  |
| O  | -10.26193005 | -4.01791505 | -8.52437308  |
| O  | -7.84970146  | 0.25576857  | -8.52103953  |

O -5.39191932 4.45267715 -8.51095854  
O -7.80273048 -8.27775733 -8.53435575  
O -5.36660330 -4.01495858 -8.52509370  
O -2.95581266 0.30030094 -8.50272030  
O -0.50103437 4.38595795 -8.58171170  
O -2.91333522 -8.27234744 -8.52706670  
O -0.45666411 -4.04325115 -8.53582924  
O 1.96491831 -0.03928365 -8.52697601  
O 4.40823201 4.52338801 -8.48155001  
O 1.95268271 -8.26662335 -8.52493367  
O 4.45577843 -4.07611685 -8.50931347  
O 6.86835147 0.18904957 -8.50756192  
O 9.26802963 4.37760286 -8.55334618  
O -11.96081601 -7.45984427 -6.02546401  
O -9.52998813 -3.21885949 -6.03570406  
O -7.06514464 1.01120919 -6.03745109  
O -4.60565834 5.24055517 -6.04134990  
O -7.06556884 -7.44724056 -6.05593261  
O -4.62731108 -3.18571974 -6.04804846  
O -2.21862956 1.07990535 -5.99858732  
O 0.23412987 5.28161234 -6.10514476  
O -2.17745100 -7.45312729 -6.04969018  
O 0.28774398 -3.21055221 -6.07006779  
O 2.70079069 0.99883909 -6.11157220  
O 5.13786347 5.24644455 -5.98823237  
O 2.70333831 -7.47955254 -6.04318165  
O 5.17039861 -3.26482748 -6.02459100  
O 7.59098228 0.99471870 -6.01535138  
O 10.00553381 5.25996821 -6.07700020  
O -9.61810145 -6.92734015 -9.67024756  
O -7.18892160 -2.69259588 -9.68777812  
O -4.84134520 1.47983363 -9.76963625  
O -2.24763168 5.94909886 -9.52405239  
O -4.72867260 -6.91316459 -9.65927225  
O -2.23398938 -2.63240988 -9.63900761  
O 0.27158674 1.50777407 -9.78736574  
O 2.56025023 5.65222920 -9.81654457  
O 0.11817454 -6.94362886 -9.65370428

|    |              |             |             |
|----|--------------|-------------|-------------|
| O  | 2.57725505   | -2.76931184 | -9.73563649 |
| O  | 4.97755993   | 1.60217179  | -9.71049697 |
| O  | 7.46113077   | 5.73862898  | -9.67968304 |
| O  | 5.03636332   | -6.90722583 | -9.64710114 |
| O  | 7.43880387   | -2.70720494 | -9.64189612 |
| O  | 9.83489087   | 1.52151591  | -9.67844244 |
| O  | 12.35556075  | 5.78052254  | -9.66824790 |
| O  | -7.84302028  | -4.51676190 | -7.65646226 |
| O  | -5.42789555  | -0.31011911 | -7.68927693 |
| O  | -2.94736249  | 3.92799519  | -7.69259619 |
| O  | -0.49797697  | 8.20919255  | -7.65064374 |
| O  | -2.94614594  | -4.47884250 | -7.64794734 |
| O  | -0.53627519  | -0.15812025 | -7.62730596 |
| O  | 1.92863150   | 3.96870211  | -7.69104098 |
| O  | 4.39965906   | 8.19351330  | -7.65601949 |
| O  | 1.96221034   | -4.54221957 | -7.68062408 |
| O  | 4.42994263   | -0.33793465 | -7.68726190 |
| O  | 6.82722650   | 3.97606399  | -7.60155248 |
| O  | 9.27459029   | 8.16109718  | -7.64162198 |
| O  | 6.86195853   | -4.58065483 | -7.63083156 |
| O  | 9.27566894   | -0.31726379 | -7.63071181 |
| O  | 11.69503440  | 3.94113962  | -7.65807755 |
| O  | 14.15846633  | 8.16391276  | -7.67157333 |
| Si | -10.96551754 | -6.33194417 | -5.38317095 |
| Si | -8.54098196  | -2.08162422 | -5.39609330 |
| Si | -6.07773216  | 2.14949765  | -5.39832412 |
| Si | -3.63553910  | 6.38763358  | -5.39294499 |
| Si | -6.07994998  | -6.32324427 | -5.39222877 |
| Si | -3.62936332  | -2.06379522 | -5.39406140 |
| Si | -1.17896680  | 2.19113426  | -5.37998949 |
| Si | 1.24201947   | 6.37488703  | -5.42194926 |
| Si | -1.17868276  | -6.33494514 | -5.39329877 |
| Si | 1.28418540   | -2.11086239 | -5.36995497 |
| Si | 3.67799904   | 2.12169229  | -5.42096783 |
| Si | 6.13448171   | 6.38133861  | -5.36835566 |
| Si | 3.69404427   | -6.35904337 | -5.37818505 |
| Si | 6.14646420   | -2.11734807 | -5.37881305 |
| Si | 8.57441313   | 2.13606458  | -5.37829821 |



|    |              |             |              |
|----|--------------|-------------|--------------|
| Si | 11.00782962  | 6.36966266  | -5.40979231  |
| Si | -9.40121604  | -4.39060288 | -7.17632307  |
| Si | -6.97823925  | -0.14882358 | -7.19246507  |
| Si | -4.49334233  | 4.07272846  | -7.19187567  |
| Si | -2.05459824  | 8.32564844  | -7.17235610  |
| Si | -4.51257775  | -4.37152243 | -7.17255982  |
| Si | -2.10615451  | -0.06687098 | -7.15369528  |
| Si | 0.37219999   | 4.08771383  | -7.23105164  |
| Si | 2.83920384   | 8.32041238  | -7.18402270  |
| Si | 0.41130042   | -4.40455237 | -7.18421455  |
| Si | 2.89011936   | -0.23360988 | -7.17575292  |
| Si | 5.26005984   | 4.09639560  | -7.15799834  |
| Si | 7.71479156   | 8.30688455  | -7.17040435  |
| Si | 5.30751375   | -4.44560077 | -7.14909867  |
| Si | 7.71047631   | -0.17616904 | -7.16369200  |
| H  | -7.95795163  | 2.57706550  | -9.97153633  |
| H  | -3.12061488  | 2.69794288  | -10.07945028 |
| H  | 1.30437599   | -2.08067037 | -14.04694575 |
| H  | 6.57047357   | 2.50953281  | -9.90224487  |
| H  | 9.17126464   | 6.77622075  | -9.95447889  |
| H  | 4.29915524   | 6.80956584  | -9.99393493  |
| H  | -0.62426659  | 6.81144062  | -9.92941273  |
| H  | -5.45125680  | 6.81435453  | -9.98599900  |
| H  | -10.36259020 | -1.69714120 | -9.94845486  |
| H  | -5.35425447  | -1.74282112 | -9.97320575  |
| H  | -0.96802564  | -1.68508062 | -9.74275516  |
| H  | 5.13894584   | -0.84057038 | -10.98144090 |
| H  | -12.81142212 | -5.91903344 | -9.97282128  |
| H  | -7.91441863  | -5.92261197 | -9.96261900  |
| H  | -3.08306745  | -5.85030315 | -9.97090215  |
| H  | 1.85780185   | -5.96134573 | -9.93933699  |
| H  | -3.12063927  | 6.26237598  | -9.86379803  |
| H  | -8.09116607  | -2.31702535 | -9.85630873  |
| H  | -10.51942603 | -6.57324199 | -9.87005960  |
| H  | -5.74412919  | 1.87737885  | -9.87355872  |
| H  | 1.65553083   | 6.03096063  | -9.91430914  |
| H  | 1.13096564   | 2.01246751  | -9.85064565  |
| H  | -3.13945836  | -2.22550851 | -9.80014933  |

|      |             |             |              |
|------|-------------|-------------|--------------|
| H    | -5.63240707 | -6.55846992 | -9.85628754  |
| H    | 6.56503273  | 6.10040784  | -9.88296076  |
| H    | 3.65725187  | 2.32026411  | -9.89650084  |
| H    | 3.38078695  | -2.19430311 | -9.76605692  |
| H    | -0.78234804 | -6.61131071 | -9.87413994  |
| H    | 11.45203249 | 6.12936192  | -9.86785856  |
| H    | 8.91508917  | 1.85912281  | -9.83374726  |
| H    | 6.53249196  | -2.34615710 | -9.78625878  |
| H    | 4.13537826  | -6.58892079 | -9.89653813  |
| Hg   | 0.87510941  | -1.82745585 | -11.65300760 |
| O    | 1.80466524  | -2.46161540 | -13.29681508 |
| VEC1 | 19.57131164 | 0.00000000  | 0.00000000   |
| VEC2 | 9.78369180  | 16.95531931 | 0.00000000   |

**(4x4)CnO/SiO<sub>2</sub>-2OH**

**322 atoms**

|    |              |             |             |
|----|--------------|-------------|-------------|
| Si | 10.16608952  | 4.04616778  | -7.19941867 |
| Si | 12.60827014  | 8.28013249  | -7.19373343 |
| Si | -14.29774191 | -8.42223538 | -8.99817973 |
| Si | -11.85658070 | -4.22276380 | -8.99934339 |
| Si | -9.38987389  | 0.05320655  | -9.00361189 |
| Si | -6.95088252  | 4.29476311  | -9.00533458 |
| Si | -9.40584043  | -8.43072483 | -9.00502499 |
| Si | -6.94454919  | -4.19054954 | -9.01059229 |
| Si | -4.49388147  | 0.05048702  | -9.00162163 |
| Si | -2.07863533  | 4.29185072  | -9.01619472 |
| Si | -4.49132385  | -8.42016822 | -9.01236532 |
| Si | -2.04551071  | -4.18703113 | -8.99877889 |
| Si | 0.38945679   | 0.05604204  | -8.99222109 |
| Si | 2.84978079   | 4.30920916  | -9.02728185 |
| Si | 0.39754321   | -8.41863174 | -9.00263631 |
| Si | 2.84776389   | -4.17403760 | -8.97484569 |
| Si | 5.25917491   | 0.11364915  | -8.93862706 |
| Si | 7.73186929   | 4.29752452  | -9.00104701 |
| O  | -11.93979738 | -5.17899859 | -4.84133505 |
| O  | -9.49839248  | -0.94532948 | -4.85612224 |
| O  | -7.05250200  | 3.29803944  | -4.84970187 |
| O  | -4.60855633  | 7.53862397  | -4.83999450 |

O -7.04982345 -5.17978906 -4.86016411  
O -4.60165987 -0.93816141 -4.85118507  
O -2.14933585 3.30556621 -4.85902258  
O 0.28667913 7.52796804 -4.87417622  
O -2.14870283 -5.17642503 -4.84627000  
O 0.28551347 -0.93828920 -4.83170926  
O 2.74737152 3.32458513 -4.84802808  
O 5.20193269 7.55277704 -4.85067897  
O 2.73022433 -5.17811335 -4.83705763  
O 5.19171799 -0.93483293 -4.83862479  
O 7.62414577 3.30227256 -4.85707500  
O 10.07682866 7.53570409 -4.83722134  
O -10.07718843 -5.83512109 -1.27523578  
O -7.64704252 -1.58276903 -1.29206634  
O -5.19542755 2.64840190 -1.28498641  
O -2.75207193 6.88465920 -1.29214736  
O -5.19737203 -5.81975598 -1.28179037  
O -2.75219031 -1.57291536 -1.27470569  
O -0.30674262 2.66368361 -1.28400972  
O 2.13885334 6.89386271 -1.28392531  
O -0.30666001 -5.81066703 -1.26625546  
O 2.14377460 -1.57026438 -1.27406735  
O 4.58586919 2.66508305 -1.28372601  
O 7.03327659 6.90415271 -1.27072008  
O 4.58229786 -5.83131476 -1.26265543  
O 7.03365363 -1.58573392 -1.27871816  
O 9.48820924 2.64371683 -1.28135872  
O 11.92447736 6.88738779 -1.27531872  
O -12.83905400 -8.07740834 -3.08090871  
O -10.39197112 -3.85483368 -3.07332652  
O -7.95088629 0.39704955 -3.09775149  
O -5.49259196 4.62859187 -3.09035206  
O -7.94454704 -8.09653719 -3.10610264  
O -5.49705004 -3.84810520 -3.09615842  
O -3.05393573 0.39889356 -3.08588572  
O -0.60594233 4.64157779 -3.09173159  
O -3.05265127 -8.06909922 -3.07341376  
O -0.60391782 -3.83982721 -3.08169366

|   |              |             |             |
|---|--------------|-------------|-------------|
| O | 1.84026572   | 0.40648742  | -3.08121883 |
| O | 4.28666044   | 4.65557374  | -3.07607152 |
| O | 1.84425705   | -8.08429443 | -3.07746439 |
| O | 4.29005826   | -3.85686947 | -3.07608975 |
| O | 6.73761299   | 0.40050195  | -3.08022565 |
| O | 9.18960269   | 4.61439164  | -3.09270482 |
| O | -11.89661540 | -7.57593279 | -0.61181541 |
| O | -9.45697990  | -3.32724857 | -0.61007441 |
| O | -7.03444304  | 0.92501968  | -0.62666553 |
| O | -4.57416381  | 5.15208721  | -0.61934307 |
| O | -7.03453792  | -7.54971516 | -0.63638920 |
| O | -4.58385349  | -3.30903042 | -0.62675255 |
| O | -2.14231572  | 0.93804644  | -0.61429262 |
| O | 0.30584302   | 5.16936687  | -0.61802829 |
| O | -2.13107203  | -7.54550176 | -0.60519154 |
| O | 0.31095085   | -3.30015368 | -0.61247462 |
| O | 2.75791572   | 0.93730796  | -0.61067431 |
| O | 5.21623823   | 5.16398293  | -0.60722315 |
| O | 2.75482720   | -7.56312682 | -0.60382531 |
| O | 5.21247761   | -3.32342324 | -0.60992736 |
| O | 7.66048886   | 0.91604564  | -0.60967662 |
| O | 10.09606313  | 5.15278002  | -0.62015356 |
| O | -10.08499250 | -6.94512556 | -4.17588427 |
| O | -7.64738493  | -2.70320966 | -4.16548156 |
| O | -5.19494279  | 1.54533504  | -4.16482655 |
| O | -2.75585163  | 5.77999219  | -4.15964360 |
| O | -5.20177696  | -6.93254829 | -4.15771429 |
| O | -2.74897499  | -2.69522964 | -4.15753002 |
| O | -0.29941006  | 1.55213836  | -4.16256154 |
| O | 2.13980352   | 5.79481206  | -4.16453708 |
| O | -0.29860495  | -6.93557893 | -4.15218374 |
| O | 2.14681056   | -2.69555738 | -4.14890803 |
| O | 4.60710101   | 1.55838638  | -4.16531534 |
| O | 7.05705187   | 5.79117343  | -4.15156645 |
| O | 4.58291828   | -6.93692606 | -4.14699793 |
| O | 7.02353984   | -2.70884298 | -4.12026529 |
| O | 9.46513930   | 1.53034842  | -4.17500029 |
| O | 11.93423501  | 5.78041832  | -4.15396410 |

|    |              |             |             |
|----|--------------|-------------|-------------|
| O  | -7.93567089  | -4.69650020 | -2.38058107 |
| O  | -5.49865496  | -0.44569545 | -2.38117141 |
| O  | -3.04409297  | 3.77983864  | -2.38142171 |
| O  | -0.60418249  | 8.01587485  | -2.39630118 |
| O  | -3.04701744  | -4.68870023 | -2.37449578 |
| O  | -0.60173951  | -0.43057363 | -2.36287138 |
| O  | 1.84455999   | 3.80340771  | -2.37447332 |
| O  | 4.28898742   | 8.02449817  | -2.37935089 |
| O  | 1.84422815   | -4.68292206 | -2.35974764 |
| O  | 4.29073650   | -0.42962149 | -2.37115735 |
| O  | 6.73826321   | 3.79392552  | -2.37803600 |
| O  | 9.18233338   | 8.03403283  | -2.36420790 |
| O  | 6.73748834   | -4.71688702 | -2.35992178 |
| O  | 9.18356999   | -0.45537745 | -2.37943531 |
| O  | 11.63937523  | 3.78264853  | -2.37145464 |
| O  | 14.07696565  | 8.02493255  | -2.36264528 |
| Si | -11.26845124 | -6.11300314 | -0.09597588 |
| Si | -8.83343680  | -1.85691959 | -0.10784036 |
| Si | -6.39955955  | 2.38680228  | -0.11459728 |
| Si | -3.94420144  | 6.61724239  | -0.11130292 |
| Si | -6.40619535  | -6.08773063 | -0.11812824 |
| Si | -3.96016429  | -1.84381703 | -0.11087745 |
| Si | -1.50938330  | 2.40387607  | -0.11101389 |
| Si | 0.93795388   | 6.63355214  | -0.11046445 |
| Si | -1.50927077  | -6.07734033 | -0.09616403 |
| Si | 0.94094766   | -1.83542621 | -0.10264903 |
| Si | 3.38908954   | 2.40313233  | -0.10588025 |
| Si | 5.83658363   | 6.63233328  | -0.09639958 |
| Si | 3.37942413   | -6.09674951 | -0.09250289 |
| Si | 5.83686775   | -1.85525614 | -0.10321810 |
| Si | 8.29457388   | 2.37928774  | -0.10116110 |
| Si | 10.72343695  | 6.61657496  | -0.10396292 |
| Si | -9.46377829  | -4.42017211 | -1.83883469 |
| Si | -7.03158395  | -0.16800181 | -1.85527236 |
| Si | -4.57495125  | 4.06019749  | -1.84914631 |
| Si | -2.12970587  | 8.29783481  | -1.85093634 |
| Si | -4.58057104  | -4.40798621 | -1.84987787 |
| Si | -2.13709296  | -0.15887068 | -1.83962501 |

|    |              |             |              |
|----|--------------|-------------|--------------|
| Si | 0.31050103   | 4.07731054  | -1.84808225  |
| Si | 2.75457990   | 8.30403269  | -1.85727056  |
| Si | 0.31113820   | -4.39986297 | -1.83486936  |
| Si | 2.75877891   | -0.15611866 | -1.83895073  |
| Si | 5.20899458   | 4.07843104  | -1.84238396  |
| Si | 7.65105498   | 8.31729349  | -1.83413233  |
| Si | 5.20607034   | -4.42379882 | -1.83193765  |
| Si | 7.65495017   | -0.17351325 | -1.84133941  |
| Si | 10.10508712  | 4.05700078  | -1.84584856  |
| Si | 12.54356120  | 8.30171943  | -1.83485449  |
| Si | -14.36626171 | -8.34402034 | -3.60377918  |
| Si | -11.91951915 | -4.11949104 | -3.59333265  |
| Si | -9.47779161  | 0.13028068  | -3.62194714  |
| Si | -7.02070409  | 4.37036862  | -3.61302542  |
| Si | -9.47071343  | -8.35684775 | -3.63494523  |
| Si | -7.02407154  | -4.10926245 | -3.62150658  |
| Si | -4.57871072  | 0.13782507  | -3.61751253  |
| Si | -2.13138467  | 4.37364359  | -3.61926553  |
| Si | -4.57520749  | -8.33558392 | -3.60989135  |
| Si | -2.12981729  | -4.10172372 | -3.61128943  |
| Si | 0.31254825   | 0.14718207  | -3.60577102  |
| Si | 2.76202675   | 4.39389108  | -3.60891081  |
| Si | 0.31694626   | -8.34304885 | -3.60396179  |
| Si | 2.76025157   | -4.10476273 | -3.60049284  |
| Si | 5.21064870   | 0.14800915  | -3.60870986  |
| Si | 7.65923304   | 4.37215660  | -3.61570482  |
| O  | -12.00027248 | -5.48215385 | -10.06791843 |
| O  | -9.50362420  | -1.21513656 | -10.07508694 |
| O  | -7.07318293  | 3.02283266  | -10.06778410 |
| O  | -4.65606869  | 7.27796051  | -10.07462730 |
| O  | -7.05655356  | -5.46371763 | -10.07398107 |
| O  | -4.60798966  | -1.22163765 | -10.06501934 |
| O  | -2.23646432  | 3.04185749  | -10.09247232 |
| O  | 0.24495898   | 7.25250211  | -10.06483114 |
| O  | -2.16030432  | -5.46050249 | -10.06097215 |
| O  | 0.33077840   | -1.25370177 | -10.01660461 |
| O  | 2.91757513   | 3.04947257  | -10.10914518 |
| O  | 5.18071739   | 7.26704603  | -10.08172415 |

O 2.71540630 -5.42495897 -10.05791535  
O 4.91853169 -1.07990129 -10.10086916  
O 7.62295600 3.00841149 -10.04531302  
O 10.06013650 7.26692887 -10.06815989  
O -9.95431945 -5.84083089 -6.57904118  
O -7.49482476 -1.60849653 -6.57285413  
O -5.05792256 2.63665227 -6.57418270  
O -2.61286799 6.87638689 -6.56415576  
O -5.04483006 -5.84785571 -6.57070025  
O -2.60554497 -1.60883465 -6.56892153  
O -0.15744557 2.62382263 -6.58241373  
O 2.30001223 6.86742092 -6.58317976  
O -0.14716463 -5.84516200 -6.55935273  
O 2.28069637 -1.59193103 -6.55096869  
O 4.72036303 2.65066243 -6.58236558  
O 7.18947715 6.87317314 -6.56991774  
O 4.72663202 -5.84527067 -6.55451297  
O 7.21478933 -1.62170801 -6.51963035  
O 9.62525142 2.63620167 -6.57604074  
O 12.07026042 6.87327277 -6.56433493  
O -12.72268955 -8.29552442 -8.54533672  
O -10.28748281 -4.05132506 -8.55144823  
O -7.81993362 0.18535895 -8.54132090  
O -5.37989193 4.43098600 -8.54337675  
O -7.83226541 -8.29396377 -8.54901139  
O -5.37741732 -4.05402359 -8.53749806  
O -2.92492088 0.18921621 -8.53566333  
O -0.50413153 4.41703694 -8.56121644  
O -2.92273922 -8.28788635 -8.54001281  
O -0.47400996 -4.05573459 -8.53075564  
O 1.95832338 0.22163975 -8.51248731  
O 4.39823218 4.50087867 -8.51000322  
O 1.96943288 -8.28767869 -8.53772822  
O 4.42588244 -4.04395762 -8.52444467  
O 6.84533926 0.07347883 -8.54739389  
O 9.30079366 4.44239854 -8.53348694  
O -11.98392170 -7.49970214 -6.06322666  
O -9.52874073 -3.26637510 -6.07046814

O -7.07925104 0.96759252 -6.05743669  
O -4.64253023 5.21256823 -6.05550436  
O -7.07527873 -7.50953748 -6.06753752  
O -4.63150208 -3.27172472 -6.05339903  
O -2.18486054 0.96594265 -6.04963270  
O 0.28592910 5.19245383 -6.08875718  
O -2.17940862 -7.50583989 -6.05291810  
O 0.25950464 -3.26712959 -6.04243453  
O 2.69728217 0.98759955 -6.02235891  
O 5.16651553 5.21030740 -6.02329819  
O 2.69910682 -7.50703534 -6.04681566  
O 5.16354950 -3.26784966 -6.04212268  
O 7.58586399 0.98419839 -6.09294794  
O 10.04787283 5.20704418 -6.04547794  
O -9.66415907 -6.96145216 -9.68732300  
O -7.19871297 -2.72352923 -9.69601147  
O -4.76245508 1.51821470 -9.68104896  
O -2.32798140 5.77687743 -9.67126838  
O -4.74474651 -6.95053651 -9.69237704  
O -2.29885619 -2.72017910 -9.68123152  
O 0.08457795 1.50457374 -9.67255718  
O 2.53946850 5.75824242 -9.71761343  
O 0.14420704 -6.94842628 -9.68146644  
O 2.60640150 -2.68846604 -9.62765987  
O 5.10903851 1.61103958 -9.57111506  
O 7.47346255 5.75607486 -9.70107463  
O 5.02525149 -6.94221742 -9.66459086  
O 7.42965589 -2.75000537 -9.68247184  
O 9.91725886 1.51960126 -9.68223228  
O 12.36205796 5.76366946 -9.68596926  
O -7.86220169 -4.57625406 -7.69957427  
O -5.40012670 -0.33886654 -7.68212276  
O -2.96288359 3.90943927 -7.67845981  
O -0.52022058 8.14735237 -7.67837965  
O -2.95379595 -4.57303488 -7.68060843  
O -0.50581501 -0.34957289 -7.66690074  
O 1.92072273 3.85968124 -7.74858527  
O 4.38016967 8.14668841 -7.69928387



|    |              |             |             |
|----|--------------|-------------|-------------|
| O  | 1.94626514   | -4.56422754 | -7.65726286 |
| O  | 4.37298062   | -0.31396373 | -7.63169636 |
| O  | 6.81989655   | 3.92057817  | -7.68319349 |
| O  | 9.28042787   | 8.14943554  | -7.67985510 |
| O  | 6.83297904   | -4.59678533 | -7.66237930 |
| O  | 9.27703569   | -0.34761915 | -7.68625531 |
| O  | 11.72074461  | 3.90911810  | -7.68103039 |
| O  | 14.16683308  | 8.14875274  | -7.66792239 |
| Si | -10.98523442 | -6.37420256 | -5.41874670 |
| Si | -8.53491249  | -2.13899435 | -5.42071948 |
| Si | -6.09033210  | 2.10467521  | -5.41704327 |
| Si | -3.65013269  | 6.34350834  | -5.41083373 |
| Si | -6.08705802  | -6.37678692 | -5.41940268 |
| Si | -3.64133435  | -2.13562026 | -5.41293954 |
| Si | -1.19230711  | 2.10559493  | -5.42063178 |
| Si | 1.25571790   | 6.33517390  | -5.43483759 |
| Si | -1.18879366  | -6.37394618 | -5.40719876 |
| Si | 1.24597648   | -2.13247402 | -5.39622439 |
| Si | 3.70194339   | 2.12499156  | -5.40730813 |
| Si | 6.16082315   | 6.35150270  | -5.40279497 |
| Si | 3.68868806   | -6.37624082 | -5.39891976 |
| Si | 6.15109500   | -2.14072980 | -5.38230555 |
| Si | 8.58125740   | 2.10609072  | -5.42780595 |
| Si | 11.03807945  | 6.34214042  | -5.40485664 |
| Si | -9.41443669  | -4.43754553 | -7.21318691 |
| Si | -6.95470628  | -0.20147194 | -7.20256113 |
| Si | -4.51817001  | 4.04409840  | -7.20290824 |
| Si | -2.07746899  | 8.27945190  | -7.20252518 |
| Si | -4.50953036  | -4.43910674 | -7.20087697 |
| Si | -2.06179822  | -0.20236635 | -7.19725038 |
| Si | 0.37599621   | 4.02089661  | -7.23846580 |
| Si | 2.82574499   | 8.27815236  | -7.21576570 |
| Si | 0.38418167   | -4.43567377 | -7.18791474 |
| Si | 2.80229063   | -0.17600447 | -7.16965177 |
| Si | 5.26801504   | 4.06608009  | -7.19350724 |
| Si | 7.72403073   | 8.28188938  | -7.20072923 |
| Si | 5.27906969   | -4.44452668 | -7.17889355 |
| Si | 7.72630661   | -0.22649806 | -7.19060767 |

|      |              |             |              |
|------|--------------|-------------|--------------|
| H    | 9.20009738   | 6.78859411  | -10.01079280 |
| H    | 4.31679133   | 6.79709136  | -10.03995599 |
| H    | -0.61687071  | 6.77659277  | -9.99855576  |
| H    | -5.51319194  | 6.79477474  | -10.00476389 |
| H    | -3.22685860  | 6.12086238  | -9.89728977  |
| H    | 1.63244932   | 6.11808555  | -9.88969495  |
| H    | 6.57282752   | 6.11824051  | -9.89774749  |
| H    | 11.46118784  | 6.12284696  | -9.88706353  |
| H    | 6.76124041   | 2.53170964  | -9.96802363  |
| H    | 2.07257860   | 2.61550938  | -10.35052489 |
| H    | -3.09505781  | 2.56285729  | -10.01671738 |
| H    | -7.93343073  | 2.54555764  | -10.00594387 |
| H    | 9.01668928   | 1.88910280  | -9.87225197  |
| H    | 4.22835755   | 2.01250270  | -9.82352180  |
| H    | -0.81702388  | 1.81721417  | -9.92026838  |
| H    | -5.66464129  | 1.87153005  | -9.88348111  |
| H    | 4.18109715   | -1.68278263 | -9.80465693  |
| H    | -0.53464447  | -1.72371796 | -9.99864221  |
| H    | -5.46798529  | -1.69954008 | -10.00994539 |
| H    | -10.36018171 | -1.69396027 | -10.02064080 |
| H    | 6.54002917   | -2.50702575 | -10.00425151 |
| H    | 1.70535032   | -2.31046798 | -9.82668153  |
| H    | -3.19785513  | -2.35959893 | -9.88708851  |
| H    | -8.09815190  | -2.36248228 | -9.89575438  |
| H    | -12.85602831 | -5.96861508 | -9.98521425  |
| H    | -7.91432215  | -5.94469377 | -10.01447169 |
| H    | -3.02171458  | -5.93686302 | -10.00615052 |
| H    | 1.85647776   | -5.90629649 | -9.99854345  |
| H    | 4.12699832   | -6.58760599 | -9.88007039  |
| H    | -0.75676321  | -6.58775120 | -9.88226018  |
| H    | -5.64537965  | -6.59210771 | -9.89557877  |
| H    | -10.56784315 | -6.62272076 | -9.90226050  |
| Cn   | 3.36955794   | -0.04666823 | -11.83165054 |
| O    | 2.08405257   | 0.84358463  | -12.98782272 |
| VEC1 | 19.57131164  | 0.00000000  | 0.00000000   |
| VEC2 | 9.78369179   | 16.95531931 | 0.00000000   |

**(4x4)PbO/SiO<sub>2</sub>-2OH**

**322 atoms**

|    |                    |                   |                   |
|----|--------------------|-------------------|-------------------|
| Si | 10.15873173001799  | 4.04739042049431  | -7.21522486919010 |
| Si | 12.61866096149969  | 8.29367673664662  | -7.21798808620432 |
| Si | -14.26645199407478 | -8.41716313709335 | -9.01211124774173 |
| Si | -11.83657779225909 | -4.20722669554970 | -8.96535677117614 |
| Si | -9.40590724185149  | 0.04266860314953  | -9.00475953277927 |
| Si | -6.93570292974233  | 4.28419011811948  | -9.00645514708579 |
| Si | -9.38942390598402  | -8.41942587798771 | -8.99434731930497 |
| Si | -6.94679457095785  | -4.18081434813154 | -9.00294688477582 |
| Si | -4.49206574593791  | 0.05985967837646  | -8.98966227856720 |
| Si | -2.04811348332324  | 4.30219433573512  | -8.98743732313484 |
| Si | -4.49496852333072  | -8.42040564807040 | -8.99857049062356 |
| Si | -2.04227477062916  | -4.18805021026030 | -8.99462988029393 |
| Si | 0.31602005628966   | 0.12380723000404  | -8.89162423381399 |
| Si | 2.82742525709292   | 4.28310832948345  | -8.99565468752182 |
| Si | 0.40468485265004   | -8.43880984970198 | -9.02815594299026 |
| Si | 2.97422127311224   | -4.07756614645815 | -9.08049164400160 |
| Si | 5.25543997954113   | -0.04307230279233 | -9.04443285989700 |
| Si | 7.72043401246854   | 4.27149222918371  | -9.01578683466952 |
| O  | -11.92198655206893 | -5.16158812461142 | -4.82155991852785 |
| O  | -9.48717279395240  | -0.92871991324535 | -4.84973927040997 |
| O  | -7.03933197723605  | 3.32191154788813  | -4.85534110252921 |
| O  | -4.59953577115129  | 7.56304971613682  | -4.84826105714807 |
| O  | -7.04485167899129  | -5.16532237223625 | -4.84153714696911 |
| O  | -4.62696762098226  | -0.93952230255786 | -4.81876565374392 |
| O  | -2.13565758973723  | 3.35385865105169  | -4.80951080700351 |
| O  | 0.30184914042675   | 7.55720906588022  | -4.83677761440630 |
| O  | -2.08800201453142  | -5.15007026676588 | -4.89664417840809 |
| O  | 0.28627506592660   | -0.96010472420622 | -4.83351468782551 |
| O  | 2.72749954725677   | 3.31081546780571  | -4.83817031088597 |
| O  | 5.19098360729942   | 7.55526641552284  | -4.85064535691903 |
| O  | 2.75432233332273   | -5.17094930563585 | -4.86447234255299 |
| O  | 5.18707903027878   | -0.95176025527645 | -4.84150676717068 |
| O  | 7.62169048075721   | 3.30694011511887  | -4.86958148834454 |
| O  | 10.08606557580369  | 7.55770303297072  | -4.87391568458548 |
| O  | -10.06622853041474 | -5.81210671672431 | -1.25188401081455 |
| O  | -7.64931211023976  | -1.55182138908975 | -1.26368899617396 |

|   |                    |                   |                   |
|---|--------------------|-------------------|-------------------|
| O | -5.20809012599303  | 2.68980223171929  | -1.26728320945744 |
| O | -2.74753429138115  | 6.91196623580130  | -1.25214996841369 |
| O | -5.18607362673455  | -5.83598034720264 | -1.30340117813536 |
| O | -2.74157619702472  | -1.58154121399624 | -1.27321490747956 |
| O | -0.30795244248429  | 2.67573004543392  | -1.26803419655650 |
| O | 2.15532649352933   | 6.90066821463633  | -1.27305532493004 |
| O | -0.29802764874171  | -5.82203791493042 | -1.29597246868132 |
| O | 2.14348568292678   | -1.57922997708149 | -1.27600851935187 |
| O | 4.59517895710774   | 2.66005781558022  | -1.27819314485145 |
| O | 7.04867366222711   | 6.90356924066299  | -1.30861872374528 |
| O | 4.60184082461729   | -5.81573534055537 | -1.26223663883194 |
| O | 7.02476733193213   | -1.56465030670518 | -1.27931794189267 |
| O | 9.48377758837627   | 2.66215458385879  | -1.29703676512392 |
| O | 11.91706852515998  | 6.89508447767904  | -1.27447142785750 |
| O | -12.83934204188822 | -8.07568961439780 | -3.06651465219134 |
| O | -10.37131896520146 | -3.83417387352701 | -3.05743027162334 |
| O | -7.95612388628542  | 0.41559210835682  | -3.08322311901633 |
| O | -5.49823017419885  | 4.65801596201207  | -3.08530475268565 |
| O | -7.93737257202211  | -8.06937482980391 | -3.06876655552001 |
| O | -5.48392056295618  | -3.83569132705334 | -3.08804056559633 |
| O | -3.05487533402699  | 0.39570117625735  | -3.07728150657736 |
| O | -0.60438126665504  | 4.68476633931636  | -3.03779032643740 |
| O | -3.04247444718539  | -8.05696564807075 | -3.09431896160673 |
| O | -0.59612037184654  | -3.82627666601284 | -3.08400850261320 |
| O | 1.84092980893194   | 0.39444050633828  | -3.08817881284556 |
| O | 4.29291383233112   | 4.63675158209458  | -3.08350285686969 |
| O | 1.86365219240452   | -8.09132201869766 | -3.09550432801106 |
| O | 4.29900681836767   | -3.84833289033345 | -3.08132139190082 |
| O | 6.72233269949810   | 0.41446484763787  | -3.08858297634672 |
| O | 9.18193684782275   | 4.63491567809885  | -3.11032697429459 |
| O | -11.90596882668749 | -7.53804450839970 | -0.59989543142606 |
| O | -9.44941999781591  | -3.30578325234882 | -0.58949856979065 |
| O | -7.04917489223636  | 0.96483788096023  | -0.61229840586607 |
| O | -4.60394445639409  | 5.20096053051055  | -0.60629677019878 |
| O | -7.00531333027780  | -7.55560430814793 | -0.59686642318124 |
| O | -4.53297270881587  | -3.34812822087856 | -0.62219724508220 |
| O | -2.13155701674259  | 0.93219374095139  | -0.61147918879935 |
| O | 0.34275533325833   | 5.16820875986030  | -0.57043924491649 |

|   |                    |                   |                   |
|---|--------------------|-------------------|-------------------|
| O | -2.11659262504896  | -7.55608585532886 | -0.61715540215285 |
| O | 0.33117776229814   | -3.32468002511929 | -0.61436125515572 |
| O | 2.75843619319881   | 0.93179312621972  | -0.62003814372115 |
| O | 5.23079229355860   | 5.16645883026579  | -0.62079664681896 |
| O | 2.76640334499104   | -7.55269315027201 | -0.62161262765547 |
| O | 5.20271563977290   | -3.30201307296363 | -0.61023837854170 |
| O | 7.65020472350279   | 0.93916289370985  | -0.61798166915718 |
| O | 10.07877991092013  | 5.17151436366497  | -0.63327367459068 |
| O | -10.07817502543129 | -6.91966314369369 | -4.14366780622679 |
| O | -7.63538521730119  | -2.68647867565760 | -4.14951507681802 |
| O | -5.19459944546678  | 1.55485586175587  | -4.15659120353606 |
| O | -2.75224275762614  | 5.82235212972360  | -4.12748302090592 |
| O | -5.18619174675565  | -6.91960427160473 | -4.16728835401805 |
| O | -2.75599955152003  | -2.70158432372459 | -4.15557076083417 |
| O | -0.30333555376584  | 1.53753732324226  | -4.15866972973828 |
| O | 2.15396469062929   | 5.79586976043674  | -4.14795947304412 |
| O | -0.24925306194174  | -6.90807720284565 | -4.19219330762312 |
| O | 2.15263694836333   | -2.70042939010319 | -4.15898142723883 |
| O | 4.56381679352906   | 1.52974318034602  | -4.17044465291211 |
| O | 7.03217984652634   | 5.78375468799623  | -4.16863736529494 |
| O | 4.55609697860879   | -6.94038840765290 | -4.10609497520453 |
| O | 7.06799137469725   | -2.67330409391023 | -4.12676661491769 |
| O | 9.46507036645097   | 1.54570836713284  | -4.17995960560344 |
| O | 11.93102199856446  | 5.79997052817167  | -4.17656950934210 |
| O | -7.92078903128716  | -4.67494783214691 | -2.35634693981598 |
| O | -5.50312094168481  | -0.41263132330004 | -2.34804258349437 |
| O | -3.05138367997263  | 3.82845149618391  | -2.34354674357227 |
| O | -0.60067477847868  | 8.04212904797182  | -2.36330519758486 |
| O | -3.03712687598396  | -4.72318687043853 | -2.41927815329391 |
| O | -0.60122187275380  | -0.44225936385734 | -2.36733462974956 |
| O | 1.84517849433517   | 3.80579901783183  | -2.36181796870283 |
| O | 4.30009737223697   | 8.04479981431225  | -2.37688272360675 |
| O | 1.85522936521107   | -4.69501945610778 | -2.38427674040031 |
| O | 4.29014760009845   | -0.44828219772346 | -2.37174921896977 |
| O | 6.74350673308991   | 3.78564728406950  | -2.38734247050131 |
| O | 9.19382354873997   | 8.05672631803946  | -2.40167785192414 |
| O | 6.75306536981820   | -4.67491121235965 | -2.34991041163101 |
| O | 9.17360723507595   | -0.43229302073326 | -2.37952138034237 |

|    |                    |                   |                   |
|----|--------------------|-------------------|-------------------|
| O  | 11.63155360982348  | 3.81043065369060  | -2.38350487791478 |
| O  | 14.08358017105221  | 7.99805360027005  | -2.35585197208420 |
| Si | -11.27618394547256 | -6.07450967734894 | -0.08713531624879 |
| Si | -8.84515271979906  | -1.82757204090152 | -0.08893615834925 |
| Si | -6.42017840125923  | 2.43019946533451  | -0.10399240597488 |
| Si | -3.97216960408062  | 6.66652192197777  | -0.09878874371587 |
| Si | -6.36310542672226  | -6.09001509569259 | -0.10386006294747 |
| Si | -3.92242764549183  | -1.88322703669724 | -0.09118574129413 |
| Si | -1.50376590544042  | 2.39519449534539  | -0.09316848095435 |
| Si | 0.97962011913128   | 6.63570278281215  | -0.07514554032846 |
| Si | -1.48315717868981  | -6.09182404066242 | -0.10968379726923 |
| Si | 0.95789469623291   | -1.86269388163538 | -0.09408583712087 |
| Si | 3.39641970329585   | 2.39058182345584  | -0.10425746897669 |
| Si | 5.86927822688055   | 6.62956254857136  | -0.11626038191550 |
| Si | 3.38815101932967   | -6.08601020457417 | -0.10545169970137 |
| Si | 5.82351341799626   | -1.83109436257565 | -0.10749503662375 |
| Si | 8.28974347072021   | 2.40101214030765  | -0.11467170174852 |
| Si | 10.70675490697766  | 6.63328375771692  | -0.11295778840767 |
| Si | -9.45116801611208  | -4.39895126752355 | -1.81856265363389 |
| Si | -7.04061836807686  | -0.13722422012866 | -1.83293743477061 |
| Si | -4.59024378911633  | 4.10349280594025  | -1.82997164159392 |
| Si | -2.12979796452789  | 8.32171691002673  | -1.82645475431180 |
| Si | -4.55660431773439  | -4.42650203139452 | -1.86371424337440 |
| Si | -2.13141735417489  | -0.16532816390325 | -1.83573868551774 |
| Si | 0.32116520377624   | 4.09165158575279  | -1.81305096842118 |
| Si | 2.77159871577414   | 8.31627874902044  | -1.83467942646763 |
| Si | 0.32622698318380   | -4.40807993189455 | -1.85202643709907 |
| Si | 2.75911736038753   | -0.16722516976718 | -1.84376171920914 |
| Si | 5.21643957006789   | 4.06983902059106  | -1.84610382132763 |
| Si | 7.66488116380606   | 8.32308161282016  | -1.86143155262949 |
| Si | 5.21477476605456   | -4.40264761760892 | -1.83286981587766 |
| Si | 7.64191959199487   | -0.15323321170819 | -1.84831652700084 |
| Si | 10.09498206475584  | 4.07786153327685  | -1.86122148354715 |
| Si | 12.54856146418781  | 8.30038099823426  | -1.84100417312347 |
| Si | -14.36623876967288 | -8.34240066337100 | -3.59001149050619 |
| Si | -11.89867868836068 | -4.08807837965936 | -3.58557063427006 |
| Si | -9.48097732476080  | 0.14856437678253  | -3.61758617758863 |
| Si | -7.02267225832181  | 4.39735968101386  | -3.61973374167135 |

|    |                    |                   |                    |
|----|--------------------|-------------------|--------------------|
| Si | -9.46424472758650  | -8.32690367703700 | -3.59704820007128  |
| Si | -7.01544401835777  | -4.09333057352937 | -3.60351903703694  |
| Si | -4.58700737013119  | 0.14896605205385  | -3.59370351804813  |
| Si | -2.12801356878121  | 4.42293093599929  | -3.57029122665222  |
| Si | -4.56913507647011  | -8.32517723273534 | -3.61558849686612  |
| Si | -2.11012235428607  | -4.10863003171236 | -3.63558608146600  |
| Si | 0.31481544206915   | 0.12759938656893  | -3.61159567107432  |
| Si | 2.76306057642052   | 4.38357174519733  | -3.60239899267551  |
| Si | 0.33822811209243   | -8.32471860279810 | -3.63608445863719  |
| Si | 2.77590091658965   | -4.10752193080504 | -3.62009442816596  |
| Si | 5.19893895685893   | 0.13323611666654  | -3.61800393514804  |
| Si | 7.65240601246525   | 4.37457064529847  | -3.62946952340324  |
| O  | -11.95325733923659 | -5.48694207978451 | -10.02210460388374 |
| O  | -9.51861755976000  | -1.24033223180823 | -10.05780848396719 |
| O  | -7.02443984653653  | 2.98700903530202  | -10.04863929196712 |
| O  | -4.58047007458051  | 7.24191622694097  | -10.05743601655137 |
| O  | -7.07129758573893  | -5.45762011068217 | -10.06070044916402 |
| O  | -4.56942671113114  | -1.23999164536592 | -10.03117005567622 |
| O  | -2.14865124732353  | 3.00351822941883  | -10.03465879730634 |
| O  | 0.27311740565219   | 7.25635155814037  | -10.05212084887359 |
| O  | -2.22809802663179  | -5.42496015732675 | -10.08332131523353 |
| O  | -0.08106796956071  | -1.12428039336436 | -9.94601883108233  |
| O  | 2.67603183647974   | 3.01253103714270  | -10.05816353181731 |
| O  | 5.15250508967308   | 7.26184566767959  | -10.05950313674373 |
| O  | 2.88179529202980   | -5.42892429511989 | -10.09021323040292 |
| O  | 5.08908412179835   | -1.36024370062576 | -10.00546079054389 |
| O  | 7.60727923389029   | 2.98302824864250  | -10.06051577771962 |
| O  | 10.09820197313627  | 7.23192669603005  | -10.08611741217677 |
| O  | -9.92179556488764  | -5.83239074323992 | -6.55208085342353  |
| O  | -7.48292082903455  | -1.59403812179297 | -6.55661680736542  |
| O  | -5.04296800484828  | 2.64496945274219  | -6.56515367349630  |
| O  | -2.58779355887220  | 6.88432837081565  | -6.55007153169008  |
| O  | -5.04946043687590  | -5.82634197193882 | -6.57263146047779  |
| O  | -2.63009091434273  | -1.56377815619606 | -6.53548319055375  |
| O  | -0.18454538007797  | 2.65210140900493  | -6.55845209274250  |
| O  | 2.29653529822472   | 6.88579151793221  | -6.55900903280821  |
| O  | -0.07384218158366  | -5.82719862354285 | -6.61655343191083  |
| O  | 2.30361355383285   | -1.58214355662618 | -6.54807362462883  |

|   |                    |                   |                   |
|---|--------------------|-------------------|-------------------|
| O | 4.72862447449710   | 2.65086822470376  | -6.55618694677124 |
| O | 7.19056575989882   | 6.89276668515168  | -6.56632771912659 |
| O | 4.80326996997810   | -5.89057452895894 | -6.51307393134039 |
| O | 7.18809810426818   | -1.60702623714517 | -6.54940191575324 |
| O | 9.62521662892613   | 2.64153780733654  | -6.58086464218306 |
| O | 12.08044354851248  | 6.88022576084535  | -6.59502296075045 |
| O | -12.69745155393450 | -8.29681760680177 | -8.53063987929340 |
| O | -10.24667739446889 | -4.05361139450718 | -8.54740525148524 |
| O | -7.83252243227034  | 0.18146290806158  | -8.53865369815414 |
| O | -5.36915374898209  | 4.43461675922245  | -8.52901332608034 |
| O | -7.81323786854129  | -8.29005723544908 | -8.54230589886128 |
| O | -5.36888151556023  | -4.04333977807024 | -8.55297768916582 |
| O | -2.92207076687425  | 0.20813891967762  | -8.51185636636848 |
| O | -0.47769826341483  | 4.44053191973939  | -8.52699488677026 |
| O | -2.92144213470986  | -8.28635782950452 | -8.54699865034217 |
| O | -0.47224365575300  | -4.05601798353865 | -8.57035411372098 |
| O | 1.90445267816268   | 0.17071656306694  | -8.53898034629654 |
| O | 4.40334998530286   | 4.40761117365240  | -8.55003859621073 |
| O | 1.96947003797699   | -8.27621355762960 | -8.55700131360146 |
| O | 4.53017295514341   | -4.11036840799072 | -8.49733964221365 |
| O | 6.82867590636495   | 0.12946619636124  | -8.56592063426125 |
| O | 9.29260353590130   | 4.42259456478884  | -8.55659876571162 |
| O | -11.95532186726389 | -7.49110428232229 | -6.04211668073851 |
| O | -9.51527780823707  | -3.25547001712173 | -6.05473536286872 |
| O | -7.07920750763602  | 0.99181781049351  | -6.05934051243188 |
| O | -4.61713127519367  | 5.22347798843030  | -6.03996995925006 |
| O | -7.07718509296022  | -7.48841649932471 | -6.05874826770838 |
| O | -4.64672001786216  | -3.24986844283172 | -6.06005871153076 |
| O | -2.25979652874146  | 1.04116078597527  | -6.00074177115279 |
| O | 0.26777088444080   | 5.22588447032076  | -6.03832215325294 |
| O | -2.12210591547909  | -7.47531045296460 | -6.09360697338006 |
| O | 0.29645101785339   | -3.26583323106023 | -6.09966021230680 |
| O | 2.66795038196673   | 1.00851277825275  | -6.08369843648195 |
| O | 5.15117849873606   | 5.23612450611151  | -6.07710374567963 |
| O | 2.71992232383779   | -7.50626608265920 | -6.05930820984455 |
| O | 5.19848674140027   | -3.31387735504672 | -5.99718010923254 |
| O | 7.57822627357326   | 0.98734893813066  | -6.09314606055024 |
| O | 10.04940653285421  | 5.22263827541583  | -6.07524912794192 |



|    |                    |                   |                   |
|----|--------------------|-------------------|-------------------|
| O  | -9.65084007009646  | -6.95912852477167 | -9.68801482565189 |
| O  | -7.19893260148971  | -2.71601382910376 | -9.69643735409195 |
| O  | -4.74088906889069  | 1.50051383546309  | -9.72712653765763 |
| O  | -2.31482344835094  | 5.74347396048085  | -9.71078686671374 |
| O  | -4.75340399096860  | -6.95268553140294 | -9.68827478190129 |
| O  | -2.28246312870841  | -2.69893623718680 | -9.68599809718002 |
| O  | 0.11153171203912   | 1.53885646737217  | -9.69923450424164 |
| O  | 2.57034042608199   | 5.75119231059437  | -9.67928776514622 |
| O  | 0.10715039403722   | -6.98726027550131 | -9.72250607566406 |
| O  | 2.78051023778744   | -2.65381361836786 | -9.76440396030096 |
| O  | 5.02472253550213   | 1.41257450654216  | -9.78901436304736 |
| O  | 7.45753643475410   | 5.72716073622859  | -9.72268603936810 |
| O  | 5.06327090068028   | -6.97143306435041 | -9.72736208879172 |
| O  | 7.43207382764213   | -2.75040708202136 | -9.64344980840723 |
| O  | 9.92286047624174   | 1.50213699966929  | -9.71151804989729 |
| O  | 12.38038814726599  | 5.73064604894736  | -9.72889847530056 |
| O  | -7.83447065463043  | -4.55769716125869 | -7.67131946148576 |
| O  | -5.40828525810221  | -0.31023334403350 | -7.68113421643454 |
| O  | -2.95233110716703  | 3.91537190419778  | -7.67136029124503 |
| O  | -0.49790979096006  | 8.15390535310677  | -7.66547824317052 |
| O  | -2.95513163753376  | -4.53340706884636 | -7.67575237282961 |
| O  | -0.53220465517608  | -0.22064174020063 | -7.54329557740895 |
| O  | 1.93120897117594   | 3.90168671442711  | -7.66606880238323 |
| O  | 4.38808815383020   | 8.15976130955084  | -7.67354561707487 |
| O  | 2.00214408831009   | -4.50654892835543 | -7.77859486017870 |
| O  | 4.36120137492218   | -0.27634682004697 | -7.67830402437777 |
| O  | 6.82142153736966   | 3.90464617859545  | -7.68739801900050 |
| O  | 9.28516250011472   | 8.10725165719081  | -7.71470038524611 |
| O  | 6.91427285173766   | -4.61419121398510 | -7.59537651997141 |
| O  | 9.25841855287920   | -0.32537569330088 | -7.68589176654636 |
| O  | 11.71517970924183  | 3.90854327500606  | -7.69788662127206 |
| O  | 14.17265436125361  | 8.15297911924840  | -7.69994146254259 |
| Si | -10.96695337535080 | -6.35407750728003 | -5.39935641930058 |
| Si | -8.52645605310910  | -2.12645497874986 | -5.40494221267981 |
| Si | -6.08475841033346  | 2.11883144096471  | -5.40958794577659 |
| Si | -3.63339071689515  | 6.36602970205490  | -5.39738637677409 |
| Si | -6.08541490923093  | -6.35729101277269 | -5.41366448884502 |
| Si | -3.66317209187632  | -2.12867767414412 | -5.38828684393533 |

|    |                   |                   |                    |
|----|-------------------|-------------------|--------------------|
| Si | -1.20763440794456 | 2.14054531594679  | -5.37842195549919  |
| Si | 1.26174242146487  | 6.36151921396140  | -5.39823454019830  |
| Si | -1.11897548220654 | -6.34248472892440 | -5.46163119392090  |
| Si | 1.26334263713097  | -2.13971313699356 | -5.41516614656620  |
| Si | 3.67773954772612  | 2.11197484679865  | -5.41803845892252  |
| Si | 6.14648516950275  | 6.35822996668823  | -5.42004831411951  |
| Si | 3.71297103206425  | -6.38333341181429 | -5.39798188635342  |
| Si | 6.16275583707533  | -2.14547979357149 | -5.38854451353963  |
| Si | 8.57566989672867  | 2.10628015917156  | -5.43712227136946  |
| Si | 11.04258620168001 | 6.35783570047859  | -5.43612074240346  |
| Si | -9.39637442455854 | -4.42748038449977 | -7.19770018667026  |
| Si | -6.96824506002887 | -0.18503875666577 | -7.19624998296742  |
| Si | -4.50803647079795 | 4.05687694878596  | -7.18625160121080  |
| Si | -2.05505884273450 | 8.29386849948754  | -7.18502367324060  |
| Si | -4.51656594068778 | -4.41965113475323 | -7.20311353772900  |
| Si | -2.11481375069812 | -0.13806741052610 | -7.12362638211806  |
| Si | 0.37904193747411  | 4.05571017122180  | -7.17936870118115  |
| Si | 2.83010782880163  | 8.29139307294674  | -7.19671813153490  |
| Si | 0.46660470767356  | -4.41729506805136 | -7.26703108730620  |
| Si | 2.81147953091702  | -0.18522470448343 | -7.20662441581523  |
| Si | 5.26779153420360  | 4.04690403803642  | -7.20161295822446  |
| Si | 7.74136604634515  | 8.28573568481440  | -7.21374449038643  |
| Si | 5.34063767535589  | -4.48184867141170 | -7.14794987822829  |
| Si | 7.69300783655090  | -0.20654159734939 | -7.21827698417958  |
| H  | 9.24137997381462  | 6.75033788301829  | -10.02611248547311 |
| H  | 4.29315466689364  | 6.78452684529274  | -9.98357783979525  |
| H  | -0.58912757316910 | 6.78310710177064  | -9.99031014991442  |
| H  | -5.44341189810710 | 6.76963301776724  | -10.00536971254817 |
| H  | -3.21538329884118 | 6.13453024867516  | -9.86817942832409  |
| H  | 1.66864079996484  | 6.11916738127243  | -9.86224176585977  |
| H  | 6.55591609724861  | 6.09621448068161  | -9.89485174247019  |
| H  | 11.48046434164367 | 6.11068865652906  | -9.90207663665385  |
| H  | 6.75596919559076  | 2.48885185148368  | -9.99450798843673  |
| H  | 1.82040019571392  | 2.53703405557828  | -9.94836788062760  |
| H  | -3.01024495222306 | 2.52706760161791  | -9.97029952913798  |
| H  | -7.88413240185186 | 2.50749031049649  | -9.99247514784244  |
| H  | 9.02073477234237  | 1.87003828590858  | -9.89352446727891  |
| H  | 4.12678972923494  | 1.79193648108905  | -9.93061499483171  |

|      |                    |                   |                    |
|------|--------------------|-------------------|--------------------|
| H    | -0.78836554564441  | 1.94841845777268  | -9.83965828996357  |
| H    | -5.64216371642296  | 1.89121621778197  | -9.88121238800677  |
| H    | 4.19266293469490   | -1.87179114961727 | -9.90463407276276  |
| H    | -0.88293897539703  | -1.68370069392017 | -9.70968084213675  |
| H    | -5.42792303670961  | -1.72360974331849 | -9.97735325088292  |
| H    | -10.37485346845045 | -1.72397581511361 | -9.98451687911178  |
| H    | 6.51188422504383   | -2.41289153656841 | -9.82702228937045  |
| H    | 2.34309135936232   | -2.47178498330461 | -11.19935396249383 |
| H    | -3.19035583913968  | -2.31429273040317 | -9.82648267718334  |
| H    | -8.10372964206598  | -2.35443068999394 | -9.88079538541236  |
| H    | -12.82101190663190 | -5.95705042758592 | -9.97467293996861  |
| H    | -7.93126381555557  | -5.93617305656045 | -9.99139778445599  |
| H    | -3.08528762497906  | -5.90609849286181 | -9.99028649872633  |
| H    | 2.01571816060568   | -5.88267100139152 | -10.03772245737213 |
| H    | 4.17752170303433   | -6.52806120876813 | -9.87488739791548  |
| H    | -0.80041735848577  | -6.65094271675678 | -9.90693851161989  |
| H    | -5.65801618204930  | -6.59466855172479 | -9.87422653245499  |
| H    | -10.55663104688226 | -6.58718472879772 | -9.85721669565775  |
| Pb   | 0.33467583757514   | -1.16954399153398 | -12.31569148943507 |
| O    | 2.06323808059320   | -2.26463476962044 | -12.18744899143250 |
| VEC1 | 19.57131164000000  | 0.00000000000000  | 0.00000000000000   |
| VEC2 | 9.78369180000000   | 16.95531931000000 | 0.00000000000000   |

**(4x4)FIO/SiO<sub>2</sub>-2OH**

**322 atoms**

|    |              |             |             |
|----|--------------|-------------|-------------|
| Si | 10.20789531  | 4.07084417  | -7.19511183 |
| Si | 12.66158819  | 8.30276033  | -7.19187434 |
| Si | -14.24081843 | -8.41128178 | -9.00030720 |
| Si | -11.78349666 | -4.17083261 | -9.00079389 |
| Si | -9.34735304  | 0.08419073  | -9.00218910 |
| Si | -6.90516055  | 4.34707225  | -8.98967318 |
| Si | -9.35189791  | -8.40908129 | -9.01020316 |
| Si | -6.87822957  | -4.14833674 | -9.00089971 |
| Si | -4.56156716  | 0.17571833  | -8.95424740 |
| Si | -2.02874514  | 4.29956320  | -9.00173697 |
| Si | -4.45654144  | -8.40938260 | -9.02586771 |
| Si | -1.91032335  | -4.14893402 | -9.01500428 |
| Si | 0.38876295   | -0.00609224 | -9.03329683 |

|    |              |             |             |
|----|--------------|-------------|-------------|
| Si | 2.86841932   | 4.29542221  | -9.02191472 |
| Si | 0.44788640   | -8.41149784 | -9.01392577 |
| Si | 2.89680786   | -4.20200179 | -8.96804585 |
| Si | 5.31863505   | 0.05974125  | -9.01860320 |
| Si | 7.78073820   | 4.31135200  | -9.01399246 |
| O  | -11.88750363 | -5.15323505 | -4.85359642 |
| O  | -9.47593381  | -0.92764017 | -4.83072367 |
| O  | -7.00525404  | 3.34934537  | -4.82089197 |
| O  | -4.54702024  | 7.57514251  | -4.83832767 |
| O  | -6.96788324  | -5.15004948 | -4.87492641 |
| O  | -4.57777380  | -0.94041659 | -4.83314067 |
| O  | -2.13247331  | 3.32630333  | -4.85666856 |
| O  | 0.33349937   | 7.56244798  | -4.85626675 |
| O  | -2.09614160  | -5.15666821 | -4.86416286 |
| O  | 0.32345088   | -0.94798352 | -4.85961094 |
| O  | 2.77281064   | 3.32225439  | -4.87880645 |
| O  | 5.22749423   | 7.56324908  | -4.87481357 |
| O  | 2.79452357   | -5.15422240 | -4.83380802 |
| O  | 5.23137683   | -0.91729997 | -4.86429978 |
| O  | 7.67704234   | 3.33237407  | -4.85986340 |
| O  | 10.11812975  | 7.57128246  | -4.84968869 |
| O  | -10.03781840 | -5.81461783 | -1.29184139 |
| O  | -7.60097566  | -1.56026340 | -1.27271977 |
| O  | -5.16037284  | 2.68302726  | -1.27636890 |
| O  | -2.69729394  | 6.91171739  | -1.27257804 |
| O  | -5.14913505  | -5.80968070 | -1.29665316 |
| O  | -2.71537257  | -1.56658404 | -1.28722391 |
| O  | -0.25588891  | 2.66335112  | -1.29573487 |
| O  | 2.19215164   | 6.90823977  | -1.30302801 |
| O  | -0.25258544  | -5.80058678 | -1.26924652 |
| O  | 2.16332343   | -1.54928631 | -1.30297413 |
| O  | 4.62832352   | 2.67309570  | -1.30920713 |
| O  | 7.05652864   | 6.90437451  | -1.26940594 |
| O  | 4.64666626   | -5.80252159 | -1.26604437 |
| O  | 7.06631808   | -1.54378217 | -1.27614150 |
| O  | 9.50928226   | 2.69608291  | -1.27881156 |
| O  | 11.97062087  | 6.91775834  | -1.25215410 |
| O  | -12.79225568 | -8.05477985 | -3.06314492 |

O -10.33866694 -3.82528817 -3.09020526  
O -7.90961690 0.41016877 -3.08555180  
O -5.45688779 4.68171025 -3.05811898  
O -7.89541136 -8.05802220 -3.09799625  
O -5.45094277 -3.81721622 -3.08844167  
O -3.01633569 0.41159494 -3.09562499  
O -0.55795743 4.63893940 -3.09975053  
O -2.99735552 -8.08547308 -3.09514849  
O -0.55631630 -3.82976659 -3.08646793  
O 1.85769160 0.42745282 -3.11502296  
O 4.33067282 4.65090551 -3.11637388  
O 1.87386621 -8.06962258 -3.06399196  
O 4.34312918 -3.82205582 -3.07046417  
O 6.76099678 0.42338918 -3.09298814  
O 9.22203893 4.66844434 -3.09145366  
O -11.85182275 -7.54547529 -0.59503080  
O -9.40807971 -3.31460901 -0.62467235  
O -6.99683607 0.95460493 -0.61688049  
O -4.51478634 5.17740688 -0.59087339  
O -6.97189180 -7.54442364 -0.62647734  
O -4.52768999 -3.30875769 -0.61824594  
O -2.09225012 0.94025066 -0.62726527  
O 0.37107104 5.16964788 -0.63265175  
O -2.08582501 -7.54073354 -0.62743761  
O 0.35199482 -3.28835367 -0.61567808  
O 2.78474902 0.95570250 -0.64498861  
O 5.22037305 5.17853747 -0.63403706  
O 2.81235644 -7.52942017 -0.60236247  
O 5.26701546 -3.29763939 -0.60376314  
O 7.66970058 0.97090367 -0.62237701  
O 10.11585917 5.20371670 -0.61018972  
O -10.03869792 -6.91161218 -4.16534129  
O -7.60924325 -2.68654178 -4.15624057  
O -5.15762976 1.55945888 -4.16246460  
O -2.69633326 5.81027372 -4.14882697  
O -5.12354181 -6.91040896 -4.18275204  
O -2.70105500 -2.68153905 -4.16698511  
O -0.31331119 1.52763195 -4.20430169

|    |              |             |             |
|----|--------------|-------------|-------------|
| O  | 2.17971965   | 5.79736712  | -4.17590319 |
| O  | -0.31024227  | -6.93984774 | -4.09213323 |
| O  | 2.21046701   | -2.66750712 | -4.15116630 |
| O  | 4.61791701   | 1.56054186  | -4.19033269 |
| O  | 7.08058057   | 5.81183711  | -4.18171731 |
| O  | 4.63736753   | -6.90722053 | -4.13811805 |
| O  | 7.08356323   | -2.67605967 | -4.15829522 |
| O  | 9.52332820   | 1.56699407  | -4.16489116 |
| O  | 11.96939065  | 5.82663975  | -4.14019243 |
| O  | -7.89040764  | -4.69539584 | -2.39823954 |
| O  | -5.45757512  | -0.41962608 | -2.36519781 |
| O  | -3.00606928  | 3.81030551  | -2.37419394 |
| O  | -0.55340014  | 8.05181792  | -2.37911976 |
| O  | -2.99944892  | -4.67541714 | -2.38693567 |
| O  | -0.56945380  | -0.43797803 | -2.38886706 |
| O  | 1.89303044   | 3.79624563  | -2.39753849 |
| O  | 4.33802178   | 8.04947901  | -2.39763654 |
| O  | 1.89558279   | -4.66021758 | -2.36359043 |
| O  | 4.31154605   | -0.42055676 | -2.40004519 |
| O  | 6.77953303   | 3.82613187  | -2.38698775 |
| O  | 9.22355195   | 7.99478114  | -2.35566292 |
| O  | 6.79369520   | -4.67012613 | -2.37203611 |
| O  | 9.21493093   | -0.40534480 | -2.36079584 |
| O  | 11.66911937  | 3.83669467  | -2.35098331 |
| O  | 14.11646530  | 8.04705767  | -2.36429425 |
| Si | -11.21909261 | -6.07693673 | -0.09923499 |
| Si | -8.79631258  | -1.84756226 | -0.10113359 |
| Si | -6.36377055  | 2.41766034  | -0.10536691 |
| Si | -3.88395009  | 6.64384623  | -0.08661179 |
| Si | -6.34240471  | -6.07911852 | -0.11764271 |
| Si | -3.90206447  | -1.84404576 | -0.10402039 |
| Si | -1.45146912  | 2.39960390  | -0.11657615 |
| Si | 1.00483365   | 6.63194177  | -0.11957653 |
| Si | -1.46755920  | -6.07193746 | -0.11374778 |
| Si | 0.96994347   | -1.81255582 | -0.12284263 |
| Si | 3.42799823   | 2.41309120  | -0.13320965 |
| Si | 5.84365873   | 6.64126251  | -0.11089698 |
| Si | 3.44291506   | -6.06422315 | -0.09491567 |

|    |              |             |              |
|----|--------------|-------------|--------------|
| Si | 5.87076624   | -1.81957364 | -0.10178227  |
| Si | 8.30269838   | 2.43348536  | -0.11077698  |
| Si | 10.74904894  | 6.66622368  | -0.09653097  |
| Si | -9.41627163  | -4.40355897 | -1.85686163  |
| Si | -6.99060950  | -0.14542779 | -1.83920174  |
| Si | -4.53209471  | 4.09610237  | -1.82955498  |
| Si | -2.08016256  | 8.32696942  | -1.83342048  |
| Si | -4.52961266  | -4.39420746 | -1.85394244  |
| Si | -2.09813362  | -0.15494199 | -1.85402886  |
| Si | 0.36375815   | 4.07550278  | -1.85999084  |
| Si | 2.80856964   | 8.32476412  | -1.86140014  |
| Si | 0.36008261   | -4.38735553 | -1.83951051  |
| Si | 2.77927355   | -0.13794939 | -1.87359570  |
| Si | 5.24216902   | 4.09045697  | -1.86695651  |
| Si | 7.68986468   | 8.30597412  | -1.84111305  |
| Si | 5.26442488   | -4.39054353 | -1.83292134  |
| Si | 7.67781155   | -0.12975196 | -1.84406578  |
| Si | 10.12988268  | 4.11016558  | -1.83738016  |
| Si | 12.58711112  | 8.32746957  | -1.82630302  |
| Si | -14.31729561 | -8.31517102 | -3.59435984  |
| Si | -11.86715754 | -4.08377695 | -3.61380439  |
| Si | -9.44003282  | 0.15987557  | -3.60611501  |
| Si | -6.98317684  | 4.42284747  | -3.58588727  |
| Si | -9.42338778  | -8.31965935 | -3.61934003  |
| Si | -6.97131011  | -4.09232766 | -3.62674966  |
| Si | -4.54571742  | 0.14988752  | -3.61283065  |
| Si | -2.09033719  | 4.39232483  | -3.61473158  |
| Si | -4.52346543  | -8.32437191 | -3.63285147  |
| Si | -2.08026684  | -4.08817278 | -3.62288995  |
| Si | 0.33286952   | 0.14177382  | -3.64001950  |
| Si | 2.80232812   | 4.38931289  | -3.63764330  |
| Si | 0.34754322   | -8.34221736 | -3.58581449  |
| Si | 2.81711096   | -4.07838491 | -3.59944056  |
| Si | 5.23800563   | 0.15933307  | -3.63129367  |
| Si | 7.69753060   | 4.40799749  | -3.62526758  |
| O  | -11.92398134 | -5.43763040 | -10.06814649 |
| O  | -9.45102333  | -1.19619944 | -10.05822469 |
| O  | -7.01343803  | 3.07764559  | -10.06451776 |

O -4.58390025 7.27183016 -10.06391298  
O -7.03893404 -5.41095875 -10.06630301  
O -4.97459635 -0.91274698 -10.14787188  
O -2.17256661 3.00914583 -10.04083919  
O 0.30782966 7.27123119 -10.07158206  
O -2.06485428 -5.45028586 -10.06918869  
O 0.24265115 -1.34636105 -9.99524978  
O 2.76002968 3.01109754 -10.07524508  
O 5.23631311 7.26464267 -10.08473198  
O 2.75766888 -5.46756597 -10.03744479  
O 5.21171328 -1.22542994 -10.06967880  
O 7.68022256 3.03076710 -10.07232809  
O 10.12896104 7.25598150 -10.06457667  
O -9.87818025 -5.82079622 -6.57089892  
O -7.47373995 -1.56157129 -6.54359510  
O -5.03526376 2.67573020 -6.56039997  
O -2.55636689 6.89757328 -6.56081295  
O -4.96159841 -5.82119007 -6.59940179  
O -2.57449563 -1.56461062 -6.55946464  
O -0.13499098 2.65959966 -6.58116015  
O 2.33232138 6.90103165 -6.57739637  
O -0.03238293 -5.89025627 -6.48974871  
O 2.32547964 -1.58986517 -6.57172992  
O 4.77186748 2.65222380 -6.59449375  
O 7.21882135 6.89502663 -6.59982392  
O 4.80582374 -5.82760315 -6.54982218  
O 7.23661067 -1.58141892 -6.56722043  
O 9.67217706 2.65965290 -6.57358222  
O 12.12014198 6.89633469 -6.56090369  
O -12.66688436 -8.28102561 -8.54445143  
O -10.20533234 -4.04643697 -8.55472949  
O -7.78028433 0.22565833 -8.52034654  
O -5.33755603 4.48826673 -8.52043118  
O -7.77958101 -8.27006673 -8.55336176  
O -5.30087888 -4.03336787 -8.56617859  
O -2.95901146 0.13816675 -8.59890910  
O -0.45036505 4.42837884 -8.56094181  
O -2.88994102 -8.24720020 -8.55392656



O -0.33905945 -4.16513357 -8.50212819  
O 1.95739476 0.17244525 -8.56269901  
O 4.43968063 4.44207883 -8.56106072  
O 2.01273716 -8.26850649 -8.53059695  
O 4.48350584 -4.06038017 -8.55051088  
O 6.88537477 0.20293787 -8.54145281  
O 9.34675385 4.45671228 -8.53574097  
O -11.91807799 -7.47618913 -6.06699746  
O -9.49155909 -3.24365189 -6.06376019  
O -7.08309106 1.03125064 -6.02415574  
O -4.58746547 5.24145759 -6.03234290  
O -7.00279679 -7.47284966 -6.08336914  
O -4.57414595 -3.25566655 -6.07825641  
O -2.21792392 1.03847923 -6.12934844  
O 0.29824518 5.24057821 -6.08022529  
O -2.13421443 -7.49086653 -6.06066517  
O 0.33587220 -3.29411014 -6.02939429  
O 2.72851202 0.99919182 -6.09479397  
O 5.19568985 5.23010954 -6.07757149  
O 2.76936993 -7.48508020 -6.04493993  
O 5.20737402 -3.24608327 -6.06511128  
O 7.63811792 1.00216883 -6.06346342  
O 10.09359948 5.23463068 -6.04434168  
O -9.61716156 -6.94418061 -9.69537037  
O -7.13762454 -2.65825000 -9.64926011  
O -4.71884419 1.69443212 -9.55342342  
O -2.28626384 5.75796427 -9.70395132  
O -4.73809912 -6.95341040 -9.72185628  
O -2.09764492 -2.71032487 -9.70087096  
O 0.13069292 1.41005230 -9.82982790  
O 2.60525269 5.75318192 -9.72126801  
O 0.19727727 -6.96435447 -9.73410479  
O 2.60429571 -2.73749552 -9.64140776  
O 5.07132725 1.51724269 -9.72771715  
O 7.52773249 5.77044179 -9.71458934  
O 5.07211315 -6.94589332 -9.68682119  
O 7.53514659 -2.69869433 -9.67776925  
O 9.97856130 1.54379823 -9.70527245

|    |              |             |             |
|----|--------------|-------------|-------------|
| O  | 12.40867010  | 5.80620308  | -9.68282846 |
| O  | -7.78347564  | -4.52288348 | -7.67488141 |
| O  | -5.37968725  | -0.25907810 | -7.60428874 |
| O  | -2.92340558  | 3.93679615  | -7.66766481 |
| O  | -0.46467454  | 8.15757452  | -7.68517199 |
| O  | -2.86099445  | -4.53697948 | -7.70913623 |
| O  | -0.52157261  | -0.26937152 | -7.69160486 |
| O  | 1.96514603   | 3.91405785  | -7.70008642 |
| O  | 4.42413844   | 8.14251673  | -7.71158407 |
| O  | 2.06103869   | -4.60368286 | -7.60612482 |
| O  | 4.39528012   | -0.31095570 | -7.71018644 |
| O  | 6.86317071   | 3.92412725  | -7.70534136 |
| O  | 9.31215824   | 8.16600637  | -7.70373905 |
| O  | 6.89825355   | -4.55559880 | -7.67009753 |
| O  | 9.31276519   | -0.29615409 | -7.68775884 |
| O  | 11.76436098  | 3.93805517  | -7.67704882 |
| O  | 14.21626489  | 8.15922434  | -7.67590433 |
| Si | -10.92519540 | -6.34632536 | -5.42081948 |
| Si | -8.50956216  | -2.11698437 | -5.39853961 |
| Si | -6.06067685  | 2.14768162  | -5.39330398 |
| Si | -3.59064591  | 6.37539499  | -5.39886302 |
| Si | -6.00363993  | -6.34229069 | -5.44412703 |
| Si | -3.60374372  | -2.12016224 | -5.41364233 |
| Si | -1.19505645  | 2.12447247  | -5.44823225 |
| Si | 1.29118307   | 6.36799917  | -5.42750282 |
| Si | -1.14169535  | -6.37660856 | -5.38644313 |
| Si | 1.30510768   | -2.13351051 | -5.40793729 |
| Si | 3.72724519   | 2.12194277  | -5.44464351 |
| Si | 6.18674144   | 6.36653450  | -5.43807184 |
| Si | 3.75570647   | -6.34825612 | -5.40094481 |
| Si | 6.19585158   | -2.11507882 | -5.41579327 |
| Si | 8.63299114   | 2.13085334  | -5.41804405 |
| Si | 11.08146660  | 6.37343085  | -5.40381208 |
| Si | -9.34536043  | -4.41342025 | -7.20665099 |
| Si | -6.95164585  | -0.14657249 | -7.15517054 |
| Si | -4.47845627  | 4.07898942  | -7.18439933 |
| Si | -2.01912243  | 8.29996734  | -7.20165963 |
| Si | -4.41529489  | -4.41259185 | -7.23626622 |

|    |              |             |              |
|----|--------------|-------------|--------------|
| Si | -2.08253025  | -0.16967607 | -7.23651455  |
| Si | 0.41155981   | 4.06074506  | -7.21380611  |
| Si | 2.87506523   | 8.30159607  | -7.21726609  |
| Si | 0.49321673   | -4.48944516 | -7.14382421  |
| Si | 2.83877769   | -0.18551859 | -7.22692256  |
| Si | 5.30787554   | 4.06028222  | -7.22297988  |
| Si | 7.75923297   | 8.30752570  | -7.21872750  |
| Si | 5.33754918   | -4.42624373 | -7.19784935  |
| Si | 7.75597220   | -0.17162790 | -7.20427285  |
| H  | 9.26898809   | 6.77755816  | -10.00527232 |
| H  | 4.37879608   | 6.78333713  | -10.03005742 |
| H  | -0.55121994  | 6.79288839  | -10.00349268 |
| H  | -5.44677679  | 6.79888763  | -9.99530477  |
| H  | -3.18819673  | 6.12847311  | -9.88008051  |
| H  | 1.70388919   | 6.12259591  | -9.90027240  |
| H  | 6.62780244   | 6.14232177  | -9.90134884  |
| H  | 11.50621159  | 6.17285944  | -9.87878293  |
| H  | 6.82336798   | 2.54732274  | -10.01384508 |
| H  | 1.90707540   | 2.52278020  | -10.01775848 |
| H  | -3.04425554  | 2.55485026  | -9.93562489  |
| H  | -7.86129687  | 2.57922685  | -9.99258502  |
| H  | 9.07819858   | 1.91461854  | -9.89274905  |
| H  | 4.17007309   | 1.88653305  | -9.90747166  |
| H  | -0.76372853  | 1.82441660  | -9.90884388  |
| H  | -5.60815857  | 2.05064358  | -9.82322651  |
| H  | 4.36040485   | -1.71498717 | -9.98901339  |
| H  | -0.59987225  | -1.88151459 | -9.81504394  |
| H  | -5.71917003  | -1.53945851 | -9.92979654  |
| H  | -10.30609010 | -1.68327037 | -9.99280332  |
| H  | 6.63231496   | -2.34421819 | -9.87903354  |
| H  | 1.68801894   | -2.39613938 | -9.81522413  |
| H  | -4.42572909  | -4.59963971 | -11.67644576 |
| H  | -8.04251445  | -2.31110594 | -9.85835304  |
| H  | -12.78433306 | -5.91412805 | -9.99607996  |
| H  | -7.90138369  | -5.88199182 | -9.99399124  |
| H  | -2.90610174  | -5.94294780 | -9.94969633  |
| H  | 1.89494063   | -5.94322620 | -9.97511115  |
| H  | 4.16738628   | -6.58465942 | -9.87129669  |

|      |              |             |              |
|------|--------------|-------------|--------------|
| H    | -0.69849645  | -6.55908402 | -9.88615473  |
| H    | -5.64366792  | -6.59122967 | -9.89031326  |
| H    | -10.51993866 | -6.58613186 | -9.88796971  |
| Fl   | -3.20303915  | -2.06902599 | -11.75313153 |
| O    | -4.50607588  | -3.85317162 | -12.29790294 |
| VEC1 | 19.57131164  | 0.00000000  | 0.00000000   |
| VEC2 | 9.78369180   | 16.95531931 | 0.00000000   |
